# Supplementary material
Source: publisher figshare collection journal article supplement (https://gsapubs.figshare.com/articles/dataset/_/20272671)
Supplement: Supplementary file 1 [file 36210696]

Tan Shu, Yingde Jiang, Karel Schulmann, Yang Yu, Chao Yuan, Sheng Wang, Zhiyong Li, and Lingzhu Kong, 2022, Structure, geochronology, and petrogenesis of Permian peraluminous granite dykes in the southern Chinese Altai as indicators of Altai–East Junggar convergence: GSA Bulletin, <https://doi.org/10.1130/B36408.1>.

## Supplemental Material

**Table S1.** Summaries of sample locations and petrographic characteristics of the studied granite dykes from the southern Chinese Altai.

**Table S2.** LA-ICP-MS U–Pb geochronological analyses of zircon standards.

**Table S3.** LA-ICP-MS zircon/monazite U–Pb data of the granite dykes from the southern Chinese Altai.

**Table S4.** LA-ICP-MS monazite U–Pb data of the granite dykes from the southern Chinese Altai.

**Table S5.** Monazite composition of the studied granite dykes from the southern Chinese Altai.

**Table S6.** Major and trace element compositions and calculated parameters of the granite dykes from the southern Chinese Altai.

**Table S7.** Whole-rock Sr and Nd isotope data for granite dykes from the southern Chinese Altai.

TABLE S1. SUMMARIES OF SAMPLE LOCATIONS AND PETROGRAPHIC CHARACTERISTICS OF THE STUDIED GRANITE DYKES FROM THE SOUTHERN CHINESE ALTAI

| Sample number                                  | Location | GPS          |              | Lithology         | Mineral assemblage                                                         |
|------------------------------------------------|----------|--------------|--------------|-------------------|----------------------------------------------------------------------------|
|                                                |          | Long<br>(°E) | Lat<br>(°N)  |                   |                                                                            |
| <u>Fuyun granite dykes (300~292Ma)</u>         |          |              |              |                   |                                                                            |
| 18CA11                                         | Fuyun    | 89°23'07.88" | 46°59'00.75" | granite porphyry  | Phenocryst 30%(Kf+Pl+Bt/Chl+Q, 0.3-1mm) + matrix 70%(quartz-feldspathic)   |
| 18CA12                                         | Fuyun    | 89°23'10.18" | 46°58'15.56" | granite porphyry  | Phenocryst 40%(Kf+Pl+Bt/Chl+Q, 0.4-0.6mm) + matrix 60%(quartz-feldspathic) |
| 18CA87                                         | Fuyun    | 89°23'19.47" | 47°00'24.24" | granite porphyry  | Phenocryst 20%(Kf+Pl+Bt+Ms+Q, 0.5mm) + matrix 80%(quartz-feldspathic+Bt)   |
| 18CA88                                         | Fuyun    | 89°16'54.55" | 47°01'53.27" | granite porphyry  | Phenocryst 40%(Kf+Pl+Bt+Q, 0.3-0.6mm) + matrix 60%(quartz-feldspathic)     |
| 18CA89                                         | Fuyun    | 89°06'34.74" | 47°04'25.79" | granite porphyry  | Phenocryst 50%(Kf+Pl+Bt+Q, 0.3-0.6mm) + matrix 50%(quartz-feldspathic)     |
| 18CA90                                         | Fuyun    | 89°16'20.94" | 46°58'45.08" | granite porphyry  | Phenocryst 30%(Kf+Pl+Bt+Q, 0.5-1mm) + matrix 70%(quartz-feldspathic)       |
| 18CA91                                         | Fuyun    | 89°21'42.93" | 46°57'23.41" | granite porphyry  | Phenocryst 40%(Kf+Pl+Bt/Chl+Q, 0.4-1mm) + matrix 60%(quartz-feldspathic)   |
| 18CA92                                         | Fuyun    | 89°19'30.08" | 47°00'17.15" | granite porphyry  | Phenocryst 20%(Kf+Pl+Bt+Q, 0.3-0.5mm) + matrix 80%(quartz-feldspathic+Bt)  |
| <u>Kalasu-Aletai granite dykes (281~265Ma)</u> |          |              |              |                   |                                                                            |
| 18CA76                                         | Kalasu   | 88°18'38.55" | 47°30'37.17" | Two-mica granite  | Kf(25%) + Pl(30%) + Q(35%) + Bt(5%) + Ms(1%)                               |
| 18CA80                                         | Kalasu   | 88°22'59.11" | 47°28'29.63" | Two-mica granite  | Kf(32%) + Pl(30%) + Q(35%) + Bt(3%) + Ms(<1%)                              |
| 18CA82                                         | Kalasu   | 88°25'21.99" | 47°28'46.46" | Two-mica granite  | Kf(30%) + Pl(27%) + Q(40%) + Bt(2%) + Ms(1%)                               |
| 18CA83-1                                       | Kalasu   | 88°29'25.20" | 47°28'06.07" | Two-mica granite  | Kf(35%) + Pl(25%) + Q(35%) + Bt(3%) + Ms(2%)                               |
| 18CA83-2                                       | Kalasu   | 88°29'25.20" | 47°28'06.07" | Two-mica granite  | Kf(35%) + Pl(20%) + Q(30%) + Bt(2%) + Ms(8%) + Grt(2%) + Tur(3%)           |
| 18CA84                                         | Kalasu   | 88°31'02.04" | 47°28'28.16" | Muscovite granite | Kf(30%) + Pl(25%) + Q(35-37%) + Ms(5%) + Grt(3-5%)                         |
| 18CA85                                         | Kalasu   | 88°31'52.75" | 47°32'02.83" | Two-mica granite  | Kf(35%) + Pl(23-25%) + Q(35%) + Bt(2%) + Ms(3-5%)                          |
| 18CA57                                         | Aletai   | 88°03'25.69" | 47°49'56.28" | Two-mica granite  | Kf(20%) + Pl(25%) + Q(30%) + Bt(5%) + Ms(20%)                              |
| 18CA59                                         | Aletai   | 88°04'59.73" | 47°48'14.31" | Two-mica granite  | Kf(35%) + Pl(25%) + Q(35%) + Bt(2%) + Ms(3%)                               |
| 18CA63                                         | Aletai   | 88°03'39.06" | 47°49'58.38" | Muscovite granite | Kf(25%) + Pl(20%) + Q(40%) + Ms(10%) + Grt(2%) + Tur(3%)                   |
| 18CA66                                         | Aletai   | 88°04'31.43" | 47°48'57.88" | Muscovite granite | Kf(35%) + Pl(25%) + Q(30%) + Ms(8%) + Grt(2%)                              |
| 18CA67                                         | Aletai   | 87°33'36.30" | 47°55'44.27" | Two-mica granite  | Kf(25%) + Pl(35%) + Q(30%) + Bt(2%) + Ms(7%) + Grt(1%)                     |
| 18CA73                                         | Aletai   | 88°05'25.59" | 47°47'47.60" | Two-mica granite  | Kf(40%) + Pl(20-23%) + Q(30%) + Bt(5%) + Ms(2%)                            |

Note: Mineral abbreviations: Pl-plagioclase; Kf-K-feldspar; Q-quartz; Bt-biotite; Ms-muscovite; Tur-tourmaline; Grt-garnet

TABLE S2. LA-ICP-MS U-PB GEOCHRONOLOGICAL ANALYSES OF ZIRCON STANDARDS

| Analytical No. | Total       | Th/U | Th<br>(ppm) | U<br>(ppm) | Isotope ratios                       |        |                                     |        |                                     |        | Age(Ma)                              |     |                                     |    |                                     |    |
|----------------|-------------|------|-------------|------------|--------------------------------------|--------|-------------------------------------|--------|-------------------------------------|--------|--------------------------------------|-----|-------------------------------------|----|-------------------------------------|----|
|                | Pb<br>(ppm) |      |             |            | <sup>207</sup> Pb/ <sup>206</sup> Pb | 2σ     | <sup>207</sup> Pb/ <sup>235</sup> U | 2σ     | <sup>206</sup> Pb/ <sup>238</sup> U | 2σ     | <sup>207</sup> Pb/ <sup>206</sup> Pb | 2σ  | <sup>207</sup> Pb/ <sup>235</sup> U | 2σ | <sup>206</sup> Pb/ <sup>238</sup> U | 2σ |
|                |             |      |             |            |                                      |        |                                     |        |                                     |        |                                      |     |                                     |    |                                     |    |
| 91500-01       | 100.5       | 0.36 | 84.4        | 232        | 0.0749                               | 0.0052 | 1.8519                              | 0.1292 | 0.1791                              | 0.0040 | 1066                                 | 150 | 1064                                | 46 | 1062                                | 22 |
| 91500-02       | 92.8        | 0.36 | 87.7        | 240        | 0.0741                               | 0.0053 | 1.8346                              | 0.1216 | 0.1799                              | 0.0039 | 1043                                 | 153 | 1058                                | 44 | 1066                                | 21 |
| 91500-03       | 78.1        | 0.36 | 83.6        | 233        | 0.0757                               | 0.0051 | 1.8658                              | 0.1229 | 0.1784                              | 0.0039 | 1087                                 | 136 | 1069                                | 44 | 1058                                | 21 |
| 91500-04       | 82.5        | 0.36 | 89.1        | 247        | 0.0753                               | 0.0053 | 1.8589                              | 0.1357 | 0.1784                              | 0.0036 | 1076                                 | 141 | 1067                                | 48 | 1058                                | 20 |
| 91500-05       | 101.6       | 0.37 | 90.2        | 246        | 0.0745                               | 0.0054 | 1.8415                              | 0.1321 | 0.1799                              | 0.0039 | 1054                                 | 137 | 1060                                | 47 | 1066                                | 21 |
| 91500-06       | 99.1        | 0.36 | 89.0        | 247        | 0.0748                               | 0.0042 | 1.8575                              | 0.1040 | 0.1794                              | 0.0042 | 1065                                 | 115 | 1066                                | 37 | 1064                                | 23 |
| 91500-07       | 80.3        | 0.36 | 86.3        | 238        | 0.0750                               | 0.0048 | 1.8429                              | 0.1115 | 0.1789                              | 0.0045 | 1133                                 | 120 | 1061                                | 40 | 1061                                | 25 |
| 91500-08       | 90.5        | 0.36 | 89.7        | 247        | 0.0749                               | 0.0058 | 1.8502                              | 0.1397 | 0.1792                              | 0.0051 | 1065                                 | 158 | 1064                                | 50 | 1062                                | 28 |
| 91500-09       | 90.7        | 0.36 | 87.6        | 241        | 0.0755                               | 0.0045 | 1.8585                              | 0.1094 | 0.1786                              | 0.0042 | 1083                                 | 118 | 1066                                | 39 | 1059                                | 23 |
| 91500-10       | 107.1       | 0.36 | 86.6        | 238        | 0.0743                               | 0.0047 | 1.8419                              | 0.1142 | 0.1797                              | 0.0037 | 1050                                 | 139 | 1061                                | 41 | 1066                                | 20 |
| 91500-11       | 98.2        | 0.36 | 90.1        | 248        | 0.0752                               | 0.0042 | 1.8556                              | 0.1065 | 0.1788                              | 0.0036 | 1073                                 | 112 | 1065                                | 38 | 1060                                | 20 |
| 91500-12       | 82.4        | 0.36 | 88.0        | 243        | 0.0746                               | 0.0049 | 1.8448                              | 0.1179 | 0.1795                              | 0.0036 | 1057                                 | 131 | 1062                                | 42 | 1064                                | 20 |
| 91500-13       | 87.0        | 0.47 | 120         | 256        | 0.0743                               | 0.0049 | 1.8341                              | 0.1216 | 0.1788                              | 0.0057 | 1050                                 | 133 | 1058                                | 44 | 1061                                | 31 |
| 91500-14       | 87.4        | 0.46 | 117         | 255        | 0.0755                               | 0.0049 | 1.8663                              | 0.1208 | 0.1795                              | 0.0060 | 1083                                 | 130 | 1069                                | 43 | 1064                                | 33 |
| 91500-15       | 87.1        | 0.46 | 117         | 254        | 0.0749                               | 0.0054 | 1.8502                              | 0.1320 | 0.1792                              | 0.0072 | 1065                                 | 146 | 1064                                | 47 | 1062                                | 39 |
| 91500-16       | 85.6        | 0.46 | 118         | 254        | 0.0752                               | 0.0049 | 1.8562                              | 0.1139 | 0.1793                              | 0.0061 | 1072                                 | 131 | 1066                                | 41 | 1063                                | 34 |
| 91500-17       | 87.1        | 0.47 | 119         | 255        | 0.0746                               | 0.0048 | 1.8442                              | 0.1125 | 0.1791                              | 0.0059 | 1057                                 | 131 | 1061                                | 40 | 1062                                | 32 |
| 91500-18       | 84.5        | 0.47 | 117         | 250        | 0.0751                               | 0.0053 | 1.8772                              | 0.1374 | 0.1805                              | 0.0055 | 1072                                 | 131 | 1073                                | 49 | 1070                                | 30 |
| 91500-19       | 86.2        | 0.47 | 119         | 254        | 0.0746                               | 0.0054 | 1.8232                              | 0.1235 | 0.1778                              | 0.0050 | 1058                                 | 145 | 1054                                | 44 | 1055                                | 27 |
| 91500-20       | 116.3       | 0.49 | 150         | 310        | 0.0751                               | 0.0041 | 1.8528                              | 0.1011 | 0.1791                              | 0.0040 | 1072                                 | 111 | 1064                                | 36 | 1062                                | 22 |
| 91500-21       | 115.5       | 0.48 | 146         | 306        | 0.0747                               | 0.0041 | 1.8476                              | 0.1010 | 0.1793                              | 0.0036 | 1061                                 | 109 | 1063                                | 36 | 1063                                | 20 |
| 91500-22       | 116.4       | 0.48 | 147         | 307        | 0.0737                               | 0.0042 | 1.8356                              | 0.1045 | 0.1803                              | 0.0040 | 1033                                 | 124 | 1058                                | 37 | 1069                                | 22 |
| 91500-23       | 116.2       | 0.48 | 150         | 312        | 0.0761                               | 0.0042 | 1.8648                              | 0.0989 | 0.1780                              | 0.0041 | 1098                                 | 107 | 1069                                | 35 | 1056                                | 23 |
| 91500-24       | 111.5       | 0.48 | 145         | 303        | 0.0741                               | 0.0040 | 1.8247                              | 0.0948 | 0.1787                              | 0.0039 | 1056                                 | 110 | 1054                                | 34 | 1060                                | 21 |
| 91500-25       | 113.3       | 0.48 | 147         | 305        | 0.0756                               | 0.0041 | 1.8757                              | 0.1005 | 0.1796                              | 0.0040 | 1087                                 | 107 | 1073                                | 36 | 1065                                | 22 |
| 91500-26       | 115.6       | 0.48 | 148         | 308        | 0.0748                               | 0.0045 | 1.8337                              | 0.1082 | 0.1778                              | 0.0034 | 1065                                 | 113 | 1058                                | 39 | 1055                                | 19 |
| 91500-27       | 116.5       | 0.48 | 147         | 309        | 0.0749                               | 0.0045 | 1.8667                              | 0.1115 | 0.1805                              | 0.0034 | 1133                                 | 122 | 1069                                | 40 | 1070                                | 18 |
| 91500-28       | 114.2       | 0.47 | 144         | 304        | 0.0735                               | 0.0042 | 1.8239                              | 0.1025 | 0.1796                              | 0.0037 | 1028                                 | 116 | 1054                                | 37 | 1065                                | 20 |

|          |        |      |      |      |        |        |        |        |        |        |      |     |      |    |      |    |
|----------|--------|------|------|------|--------|--------|--------|--------|--------|--------|------|-----|------|----|------|----|
| 91500-29 | 127.2  | 0.48 | 164  | 342  | 0.0762 | 0.0043 | 1.8765 | 0.0992 | 0.1787 | 0.0040 | 1102 | 111 | 1073 | 35 | 1060 | 22 |
| 91500-30 | 113.7  | 0.48 | 146  | 304  | 0.0757 | 0.0043 | 1.8675 | 0.1033 | 0.1785 | 0.0035 | 1087 | 115 | 1070 | 37 | 1059 | 19 |
| 91500-31 | 115.2  | 0.48 | 146  | 307  | 0.0741 | 0.0045 | 1.8329 | 0.1026 | 0.1798 | 0.0038 | 1044 | 122 | 1057 | 37 | 1066 | 21 |
| 91500-32 | 114.9  | 0.48 | 146  | 305  | 0.0746 | 0.0046 | 1.8506 | 0.1150 | 0.1795 | 0.0035 | 1057 | 126 | 1064 | 41 | 1064 | 19 |
| 91500-33 | 113.9  | 0.48 | 147  | 306  | 0.0751 | 0.0046 | 1.8498 | 0.1125 | 0.1788 | 0.0034 | 1072 | 124 | 1063 | 40 | 1061 | 18 |
| 91500-34 | 115.2  | 0.48 | 146  | 304  | 0.0742 | 0.0038 | 1.8399 | 0.0923 | 0.1800 | 0.0040 | 1056 | 102 | 1060 | 33 | 1067 | 22 |
| 91500-35 | 116.0  | 0.48 | 148  | 308  | 0.0756 | 0.0036 | 1.8605 | 0.0900 | 0.1783 | 0.0039 | 1085 | 96  | 1067 | 32 | 1058 | 21 |
| 91500-36 | 116.8  | 0.49 | 149  | 306  | 0.0748 | 0.0045 | 1.8529 | 0.1056 | 0.1791 | 0.0036 | 1063 | 110 | 1064 | 38 | 1062 | 20 |
| 91500-37 | 115.7  | 0.48 | 146  | 301  | 0.0750 | 0.0048 | 1.8475 | 0.1072 | 0.1792 | 0.0037 | 1133 | 120 | 1063 | 38 | 1063 | 20 |
| 91500-38 | 23.8   | 0.35 | 24.3 | 70.5 | 0.0753 | 0.0059 | 1.8581 | 0.1418 | 0.1789 | 0.0042 | 1077 | 159 | 1066 | 50 | 1061 | 23 |
| 91500-39 | 25.1   | 0.34 | 24.6 | 71.9 | 0.0744 | 0.0053 | 1.8423 | 0.1263 | 0.1794 | 0.0042 | 1054 | 135 | 1061 | 45 | 1064 | 23 |
| 91500-40 | 24.9   | 0.34 | 25.7 | 74.6 | 0.0766 | 0.0055 | 1.8761 | 0.1355 | 0.1776 | 0.0040 | 1110 | 144 | 1073 | 48 | 1054 | 22 |
| 91500-41 | 26.0   | 0.34 | 25.3 | 74.1 | 0.0732 | 0.0059 | 1.8243 | 0.1477 | 0.1807 | 0.0039 | 1020 | 98  | 1054 | 53 | 1071 | 21 |
| 91500-42 | 27.1   | 0.35 | 27.2 | 78.2 | 0.0747 | 0.0049 | 1.8457 | 0.1185 | 0.1790 | 0.0037 | 1061 | 133 | 1062 | 42 | 1062 | 20 |
| 91500-43 | 26.6   | 0.35 | 27.2 | 78.3 | 0.0750 | 0.0053 | 1.8547 | 0.1292 | 0.1793 | 0.0038 | 1133 | 141 | 1065 | 46 | 1063 | 21 |
| 91500-44 | 27.5   | 0.35 | 27.5 | 77.9 | 0.0754 | 0.0054 | 1.8645 | 0.1262 | 0.1795 | 0.0039 | 1080 | 144 | 1069 | 45 | 1064 | 21 |
| 91500-45 | 29.4   | 0.36 | 29.0 | 81.6 | 0.0744 | 0.0051 | 1.8359 | 0.1191 | 0.1788 | 0.0038 | 1051 | 137 | 1058 | 43 | 1061 | 21 |
| 91500-46 | 27.9   | 0.36 | 28.6 | 78.9 | 0.0749 | 0.0048 | 1.8508 | 0.1206 | 0.1793 | 0.0039 | 1066 | 118 | 1064 | 43 | 1063 | 21 |
| 91500-47 | 27.5   | 0.36 | 28.4 | 78.9 | 0.0748 | 0.0048 | 1.8496 | 0.1209 | 0.1791 | 0.0036 | 1065 | 130 | 1063 | 43 | 1062 | 20 |
| 91500-48 | 27.7   | 0.36 | 28.3 | 79.3 | 0.0754 | 0.0055 | 1.8754 | 0.1330 | 0.1804 | 0.0039 | 1080 | 147 | 1072 | 47 | 1069 | 21 |
| 91500-49 | 27.5   | 0.36 | 28.6 | 79.7 | 0.0744 | 0.0054 | 1.8250 | 0.1285 | 0.1780 | 0.0038 | 1054 | 147 | 1054 | 46 | 1056 | 21 |
| 91500-50 | 28.2   | 0.36 | 27.8 | 77.6 | 0.0766 | 0.0054 | 1.8746 | 0.1288 | 0.1777 | 0.0044 | 1110 | 150 | 1072 | 46 | 1054 | 24 |
| 91500-51 | 26.5   | 0.35 | 26.6 | 75.4 | 0.0732 | 0.0054 | 1.8258 | 0.1345 | 0.1807 | 0.0046 | 1020 | 149 | 1055 | 48 | 1071 | 25 |
| GJ1-01   | 73.6   | 0.03 | 28.9 | 938  | 0.0598 | 0.0032 | 0.8092 | 0.0442 | 0.0976 | 0.0015 | 598  | 115 | 602  | 25 | 600  | 9  |
| GJ1-02   | 91.2   | 0.03 | 28.9 | 942  | 0.0622 | 0.0031 | 0.8186 | 0.0381 | 0.0953 | 0.0017 | 681  | 117 | 607  | 21 | 587  | 10 |
| GJ1-03   | 131.2  | 0.04 | 42.9 | 1085 | 0.0612 | 0.0035 | 0.8348 | 0.0463 | 0.0994 | 0.0033 | 656  | 117 | 616  | 26 | 611  | 19 |
| GJ1-04   | 112.79 | 0.04 | 35.9 | 918  | 0.0614 | 0.0034 | 0.8507 | 0.0459 | 0.1004 | 0.0028 | 654  | 128 | 625  | 25 | 617  | 17 |
| GJ1-05   | 154.8  | 0.04 | 45.2 | 1137 | 0.0588 | 0.0024 | 0.8033 | 0.0339 | 0.0987 | 0.0016 | 567  | 81  | 599  | 19 | 607  | 9  |
| GJ1-06   | 152.9  | 0.04 | 44.4 | 1137 | 0.0611 | 0.0026 | 0.8278 | 0.0354 | 0.0978 | 0.0016 | 643  | 89  | 612  | 20 | 602  | 10 |
| GJ1-07   | 146.8  | 0.04 | 43.0 | 1091 | 0.0596 | 0.0028 | 0.8101 | 0.0389 | 0.0978 | 0.0016 | 591  | 104 | 603  | 22 | 602  | 10 |
| GJ1-08   | 148.2  | 0.04 | 43.0 | 1094 | 0.0590 | 0.0029 | 0.8021 | 0.0381 | 0.0981 | 0.0016 | 569  | 98  | 598  | 21 | 603  | 10 |
| GJ1-09   | 25.57  | 0.03 | 9.50 | 308  | 0.0575 | 0.0032 | 0.8061 | 0.0463 | 0.1011 | 0.0018 | 522  | 122 | 600  | 26 | 621  | 10 |
| GJ1-10   | 25.46  | 0.03 | 9.58 | 309  | 0.0568 | 0.0030 | 0.7929 | 0.0414 | 0.1010 | 0.0016 | 483  | 109 | 593  | 23 | 620  | 9  |

|              |       |      |      |      |        |        |        |        |        |        |     |     |     |    |     |    |
|--------------|-------|------|------|------|--------|--------|--------|--------|--------|--------|-----|-----|-----|----|-----|----|
| GJ1-11       | 26.74 | 0.03 | 9.98 | 324  | 0.0606 | 0.0028 | 0.8211 | 0.0377 | 0.0981 | 0.0017 | 633 | 100 | 609 | 21 | 603 | 10 |
| GJ1-12       | 27.00 | 0.03 | 10.1 | 326  | 0.0598 | 0.0033 | 0.8158 | 0.0442 | 0.0987 | 0.0017 | 596 | 54  | 606 | 25 | 607 | 10 |
| GJ1-13       | 24.59 | 0.03 | 9.10 | 300  | 0.0597 | 0.0030 | 0.8206 | 0.0409 | 0.0996 | 0.0018 | 591 | 56  | 608 | 23 | 612 | 10 |
| GJ1-14       | 26.31 | 0.03 | 9.70 | 321  | 0.0582 | 0.0033 | 0.8073 | 0.0448 | 0.1001 | 0.0018 | 539 | 122 | 601 | 25 | 615 | 11 |
| Plešovice-01 | 176.9 | 0.10 | 217  | 2184 | 0.0560 | 0.0027 | 0.4111 | 0.0191 | 0.0532 | 0.0010 | 454 | 107 | 350 | 14 | 334 | 6  |
| Plešovice-02 | 132.3 | 0.10 | 206  | 2099 | 0.0556 | 0.0028 | 0.4205 | 0.0210 | 0.0547 | 0.0009 | 435 | 111 | 356 | 15 | 343 | 5  |
| Plešovice-03 | 171.3 | 0.12 | 284  | 2361 | 0.0569 | 0.0038 | 0.4213 | 0.0252 | 0.0545 | 0.0021 | 487 | 154 | 357 | 18 | 342 | 13 |
| Plešovice-04 | 211.1 | 0.13 | 334  | 2584 | 0.0549 | 0.0025 | 0.4088 | 0.0185 | 0.0539 | 0.0009 | 406 | 104 | 348 | 13 | 339 | 5  |
| Plešovice-05 | 213.2 | 0.13 | 338  | 2604 | 0.0535 | 0.0022 | 0.3994 | 0.0164 | 0.0539 | 0.0008 | 350 | 89  | 341 | 12 | 338 | 5  |
| Plešovice-06 | 206.8 | 0.13 | 318  | 2478 | 0.0507 | 0.0023 | 0.3880 | 0.0173 | 0.0552 | 0.0009 | 228 | 107 | 333 | 13 | 346 | 5  |
| Plešovice-07 | 204.9 | 0.13 | 319  | 2485 | 0.0525 | 0.0026 | 0.3947 | 0.0195 | 0.0541 | 0.0009 | 309 | 115 | 338 | 14 | 340 | 6  |
| Plešovice-08 | 53.0  | 0.11 | 98.3 | 880  | 0.0531 | 0.0024 | 0.3966 | 0.0178 | 0.0540 | 0.0008 | 332 | 109 | 339 | 13 | 339 | 5  |
| Plešovice-09 | 53.5  | 0.11 | 98.7 | 908  | 0.0534 | 0.0025 | 0.3994 | 0.0188 | 0.0541 | 0.0008 | 346 | 98  | 341 | 14 | 339 | 5  |
| Plešovice-10 | 55.9  | 0.11 | 106  | 938  | 0.0520 | 0.0025 | 0.3930 | 0.0190 | 0.0545 | 0.0008 | 287 | 111 | 337 | 14 | 342 | 5  |
| Plešovice-11 | 57.9  | 0.11 | 109  | 960  | 0.0536 | 0.0027 | 0.4005 | 0.0201 | 0.0540 | 0.0009 | 354 | 115 | 342 | 15 | 339 | 5  |

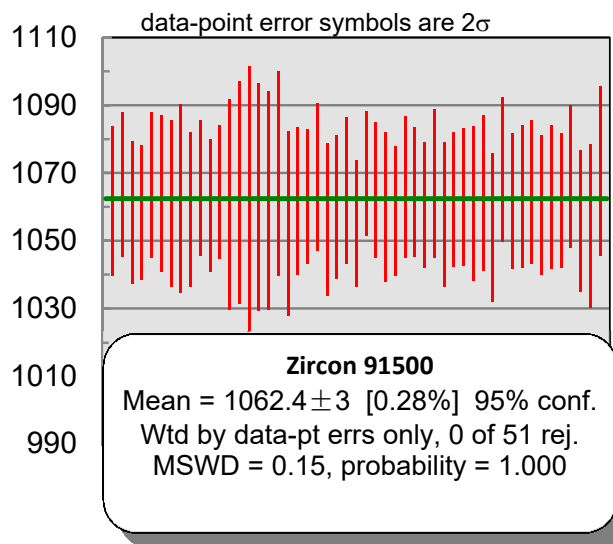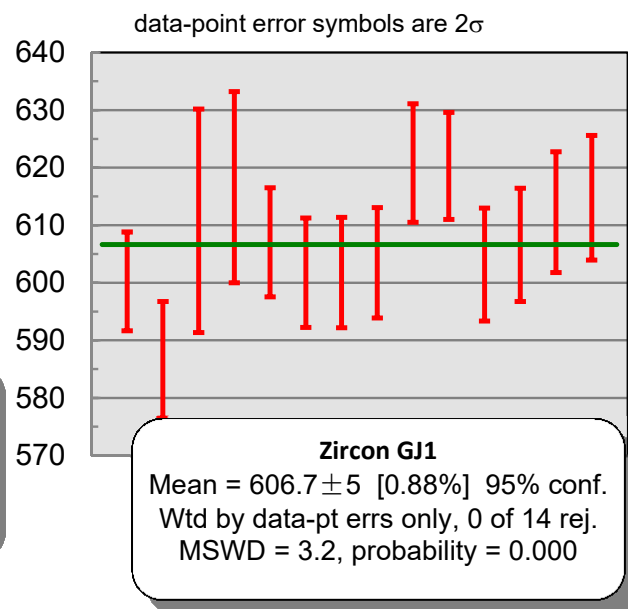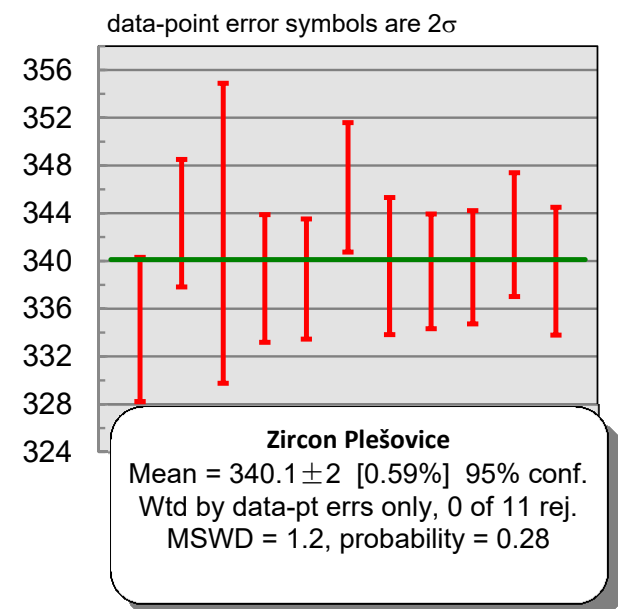

**SUPPLEMENTARY TABLE S1. LA-ICP-MS U–PB GEOCHRONOLOGICAL ANALYSES OF MONAZITE STANDARDS**

| Analytical No. | Total Pb (ppm) | Th/U | Th (ppm) | U (ppm) | Isotope ratios                       |        |                                     |        |                                     |        | Age(Ma)                              |     |                                     |    |                                     |    |
|----------------|----------------|------|----------|---------|--------------------------------------|--------|-------------------------------------|--------|-------------------------------------|--------|--------------------------------------|-----|-------------------------------------|----|-------------------------------------|----|
|                |                |      |          |         | <sup>207</sup> Pb/ <sup>206</sup> Pb | 2σ     | <sup>207</sup> Pb/ <sup>235</sup> U | 2σ     | <sup>206</sup> Pb/ <sup>238</sup> U | 2σ     | <sup>207</sup> Pb/ <sup>206</sup> Pb | 2σ  | <sup>207</sup> Pb/ <sup>235</sup> U | 2σ | <sup>206</sup> Pb/ <sup>238</sup> U | 2σ |
| 44069-01       | 633            | 9    | 25388    | 2760    | 0.0573                               | 0.0028 | 0.5265                              | 0.0260 | 0.0666                              | 0.0012 | 506                                  | 117 | 429                                 | 17 | 415                                 | 7  |
| 44069-02       | 652            | 9    | 25560    | 2717    | 0.0533                               | 0.0027 | 0.5124                              | 0.0265 | 0.0697                              | 0.0012 | 343                                  | 115 | 420                                 | 18 | 434                                 | 7  |
| 44069-03       | 831            | 12   | 36047    | 2977    | 0.0545                               | 0.0025 | 0.5107                              | 0.0243 | 0.0680                              | 0.0012 | 391                                  | 104 | 419                                 | 16 | 424                                 | 7  |
| 44069-04       | 764            | 8    | 30014    | 3566    | 0.0562                               | 0.0024 | 0.5282                              | 0.0239 | 0.0682                              | 0.0013 | 457                                  | 96  | 431                                 | 16 | 425                                 | 8  |
| 44069-05       | 1018           | 9    | 40124    | 4389    | 0.0554                               | 0.0023 | 0.5223                              | 0.0196 | 0.0685                              | 0.0012 | 428                                  | 83  | 427                                 | 13 | 427                                 | 7  |
| 44069-06       | 925            | 6    | 32740    | 5086    | 0.0553                               | 0.0023 | 0.5167                              | 0.0207 | 0.0678                              | 0.0014 | 433                                  | 102 | 423                                 | 14 | 423                                 | 9  |
| 44069-07       | 741            | 15   | 33202    | 2212    | 0.0573                               | 0.0034 | 0.5388                              | 0.0329 | 0.0682                              | 0.0015 | 502                                  | 133 | 438                                 | 22 | 425                                 | 9  |
| 44069-08       | 914            | 7    | 32170    | 4701    | 0.0533                               | 0.0027 | 0.5002                              | 0.0250 | 0.0680                              | 0.0012 | 343                                  | 111 | 412                                 | 17 | 424                                 | 7  |
| 44069-09       | 778            | 11   | 32257    | 2854    | 0.0543                               | 0.0030 | 0.5082                              | 0.0285 | 0.0678                              | 0.0013 | 383                                  | 122 | 417                                 | 19 | 423                                 | 8  |
| 44069-10       | 765            | 9    | 29039    | 3374    | 0.0563                               | 0.0027 | 0.5308                              | 0.0261 | 0.0684                              | 0.0012 | 465                                  | 111 | 432                                 | 17 | 426                                 | 8  |
| 44069-11       | 688            | 8    | 26521    | 3136    | 0.0549                               | 0.0028 | 0.5126                              | 0.0255 | 0.0677                              | 0.0013 | 409                                  | 111 | 420                                 | 17 | 423                                 | 8  |
| 44069-12       | 567            | 9    | 22285    | 2410    | 0.0557                               | 0.0030 | 0.5264                              | 0.0285 | 0.0685                              | 0.0013 | 439                                  | 109 | 429                                 | 19 | 427                                 | 8  |
| 44069-13       | 603            | 9    | 23910    | 2659    | 0.0545                               | 0.0029 | 0.5126                              | 0.0275 | 0.0681                              | 0.0012 | 394                                  | 122 | 420                                 | 18 | 425                                 | 8  |
| 44069-14       | 861            | 8    | 32355    | 4124    | 0.0561                               | 0.0027 | 0.5264                              | 0.0239 | 0.0681                              | 0.0012 | 457                                  | 43  | 429                                 | 16 | 425                                 | 7  |
| 44069-15       | 746            | 10   | 31029    | 3013    | 0.0554                               | 0.0027 | 0.5199                              | 0.0263 | 0.0680                              | 0.0021 | 428                                  | 107 | 425                                 | 18 | 424                                 | 13 |
| 44069-16       | 606            | 9    | 24478    | 2673    | 0.0552                               | 0.0029 | 0.5191                              | 0.0271 | 0.0682                              | 0.0016 | 420                                  | 115 | 425                                 | 18 | 425                                 | 10 |
| 44069-17       | 928            | 14   | 41130    | 3037    | 0.0550                               | 0.0025 | 0.5159                              | 0.0227 | 0.0680                              | 0.0012 | 413                                  | 100 | 422                                 | 15 | 424                                 | 7  |
| 44069-18       | 628            | 10   | 24634    | 2537    | 0.0557                               | 0.0030 | 0.5231                              | 0.0275 | 0.0682                              | 0.0013 | 439                                  | 109 | 427                                 | 18 | 425                                 | 8  |
| 44069-19       | 544            | 8    | 20624    | 2536    | 0.0554                               | 0.0032 | 0.5215                              | 0.0279 | 0.0682                              | 0.0015 | 428                                  | 139 | 426                                 | 19 | 425                                 | 9  |
| 44069-20       | 534            | 8    | 20445    | 2467    | 0.0552                               | 0.0033 | 0.5175                              | 0.0275 | 0.0680                              | 0.0016 | 420                                  | 133 | 423                                 | 18 | 424                                 | 10 |
| 44069-21       | 594            | 8    | 22908    | 2914    | 0.0536                               | 0.0028 | 0.5047                              | 0.0257 | 0.0682                              | 0.0014 | 354                                  | 119 | 415                                 | 17 | 426                                 | 8  |
| 44069-22       | 653            | 8    | 24899    | 3183    | 0.0570                               | 0.0025 | 0.5342                              | 0.0220 | 0.0680                              | 0.0015 | 500                                  | 96  | 435                                 | 15 | 424                                 | 9  |
| 44069-23       | 588            | 9    | 23026    | 2476    | 0.0548                               | 0.0031 | 0.5164                              | 0.0272 | 0.0682                              | 0.0018 | 406                                  | 126 | 423                                 | 18 | 425                                 | 11 |
| 44069-24       | 818            | 8    | 30675    | 3827    | 0.0558                               | 0.0029 | 0.5226                              | 0.0270 | 0.0681                              | 0.0030 | 456                                  | 115 | 427                                 | 18 | 424                                 | 18 |
| 44069-25       | 529            | 8    | 20596    | 2521    | 0.0550                               | 0.0029 | 0.5161                              | 0.0271 | 0.0680                              | 0.0014 | 413                                  | 128 | 423                                 | 18 | 424                                 | 9  |
| 44069-26       | 708            | 8    | 27363    | 3221    | 0.0557                               | 0.0028 | 0.5229                              | 0.0253 | 0.0682                              | 0.0014 | 439                                  | 111 | 427                                 | 17 | 425                                 | 9  |
| 44069-27       | 636            | 12   | 27104    | 2331    | 0.0553                               | 0.0029 | 0.5178                              | 0.0265 | 0.0680                              | 0.0014 | 433                                  | 119 | 424                                 | 18 | 424                                 | 9  |
| 44069-28       | 985            | 10   | 40123    | 4018    | 0.0553                               | 0.0025 | 0.5212                              | 0.0243 | 0.0682                              | 0.0012 | 433                                  | 104 | 426                                 | 16 | 425                                 | 7  |

|               |      |    |        |      |        |        |        |        |        |        |     |     |     |    |     |   |
|---------------|------|----|--------|------|--------|--------|--------|--------|--------|--------|-----|-----|-----|----|-----|---|
| 44069-29      | 759  | 8  | 28789  | 3423 | 0.0553 | 0.0027 | 0.5160 | 0.0243 | 0.0677 | 0.0013 | 433 | 107 | 422 | 16 | 422 | 8 |
| 44069-30      | 1201 | 9  | 45279  | 5246 | 0.0554 | 0.0024 | 0.5230 | 0.0218 | 0.0685 | 0.0013 | 428 | 87  | 427 | 15 | 427 | 8 |
| 44069-31      | 718  | 9  | 27912  | 3198 | 0.0554 | 0.0024 | 0.5171 | 0.0214 | 0.0677 | 0.0014 | 428 | 87  | 423 | 14 | 422 | 9 |
| 44069-32      | 1142 | 9  | 43135  | 5033 | 0.0552 | 0.0022 | 0.5219 | 0.0198 | 0.0685 | 0.0015 | 433 | 89  | 426 | 13 | 427 | 9 |
| 44069-33      | 775  | 8  | 28275  | 3696 | 0.0555 | 0.0026 | 0.5166 | 0.0244 | 0.0675 | 0.0013 | 432 | 94  | 423 | 16 | 421 | 8 |
| 44069-34      | 565  | 11 | 22563  | 2129 | 0.0552 | 0.0034 | 0.5223 | 0.0321 | 0.0687 | 0.0014 | 417 | 137 | 427 | 21 | 428 | 9 |
| 44069-35      | 656  | 10 | 26000  | 2735 | 0.0551 | 0.0027 | 0.5225 | 0.0263 | 0.0689 | 0.0016 | 413 | 111 | 427 | 18 | 429 | 9 |
| 44069-36      | 1102 | 9  | 43474  | 4667 | 0.0556 | 0.0026 | 0.5165 | 0.0250 | 0.0673 | 0.0013 | 435 | 104 | 423 | 17 | 420 | 8 |
| 44069-37      | 920  | 7  | 34087  | 4614 | 0.0556 | 0.0022 | 0.5222 | 0.0200 | 0.0681 | 0.0013 | 439 | 85  | 427 | 13 | 425 | 8 |
| 44069-38      | 962  | 7  | 35699  | 4882 | 0.0550 | 0.0021 | 0.5167 | 0.0194 | 0.0681 | 0.0013 | 413 | 85  | 423 | 13 | 425 | 8 |
| Trebilcock-01 | 1719 | 27 | 133623 | 5002 | 0.0526 | 0.0024 | 0.3148 | 0.0139 | 0.0435 | 0.0006 | 309 | 104 | 278 | 11 | 275 | 4 |
| Trebilcock-02 | 1727 | 27 | 134169 | 5047 | 0.0542 | 0.0028 | 0.3256 | 0.0164 | 0.0437 | 0.0007 | 376 | 115 | 286 | 13 | 276 | 4 |
| Trebilcock-03 | 1786 | 26 | 135227 | 5139 | 0.0524 | 0.0023 | 0.3139 | 0.0134 | 0.0434 | 0.0008 | 302 | 100 | 277 | 10 | 274 | 5 |
| Trebilcock-04 | 1777 | 27 | 136830 | 5103 | 0.0513 | 0.0025 | 0.3106 | 0.0155 | 0.0437 | 0.0007 | 254 | 111 | 275 | 12 | 276 | 4 |
| Trebilcock-05 | 1783 | 27 | 136399 | 5140 | 0.0516 | 0.0025 | 0.3114 | 0.0146 | 0.0437 | 0.0007 | 333 | 107 | 275 | 11 | 275 | 5 |
| Trebilcock-06 | 1787 | 27 | 141595 | 5250 | 0.0524 | 0.0026 | 0.3105 | 0.0143 | 0.0430 | 0.0007 | 302 | 111 | 275 | 11 | 272 | 4 |
| Trebilcock-07 | 1882 | 27 | 144128 | 5410 | 0.0517 | 0.0022 | 0.3089 | 0.0122 | 0.0434 | 0.0008 | 276 | 91  | 273 | 9  | 274 | 5 |
| Trebilcock-08 | 1871 | 26 | 143338 | 5432 | 0.0505 | 0.0024 | 0.3020 | 0.0140 | 0.0433 | 0.0007 | 217 | 111 | 268 | 11 | 273 | 4 |

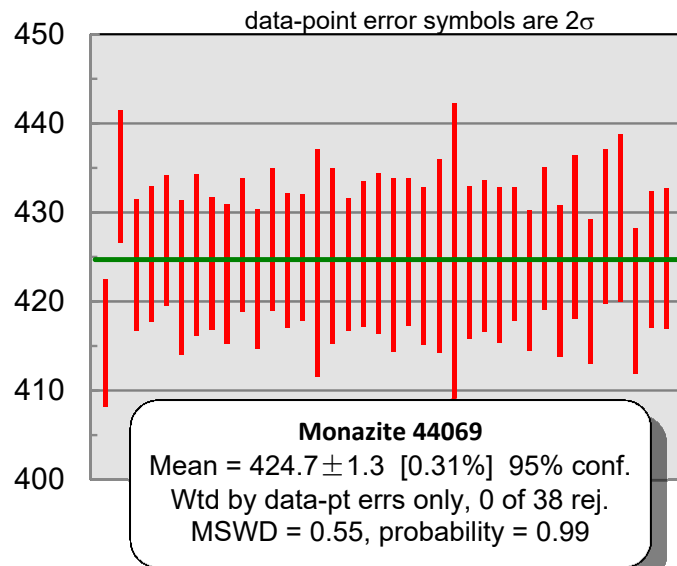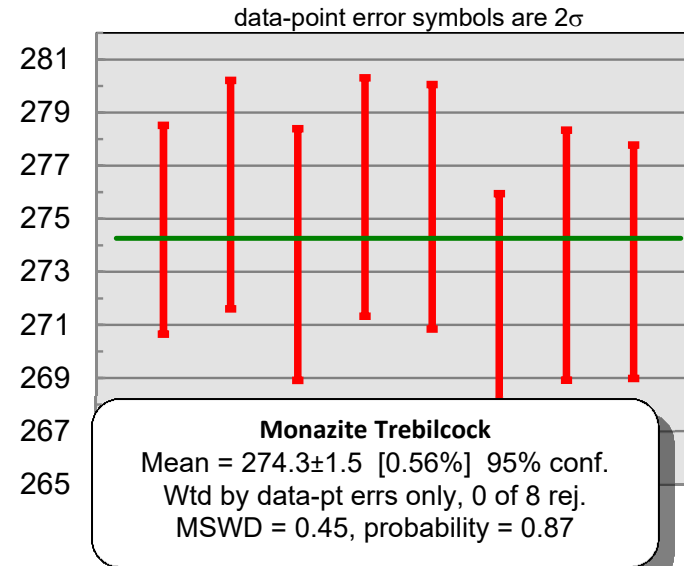

TABLE S3. LA-ICPMS ZIRCON U–PB DATA OF THE GRANITE DYKES FROM THE SOUTHERN CHINESE ALTAI

| Analytical No. | Total       | Th/U | Th<br>(ppm) | U<br>(ppm) | Isotope ratios                    |           |                                  |           |                                  |           | Corrected<br>Age(Ma)             |           | Position |
|----------------|-------------|------|-------------|------------|-----------------------------------|-----------|----------------------------------|-----------|----------------------------------|-----------|----------------------------------|-----------|----------|
|                | Pb<br>(ppm) |      |             |            | $^{207}\text{Pb}/^{206}\text{Pb}$ | $2\sigma$ | $^{207}\text{Pb}/^{235}\text{U}$ | $2\sigma$ | $^{206}\text{Pb}/^{238}\text{U}$ | $2\sigma$ | $^{206}\text{Pb}/^{238}\text{U}$ | $2\sigma$ |          |
|                |             |      |             |            |                                   |           |                                  |           |                                  |           |                                  |           |          |
| 18CA11@01      | 1431        | 0.9  | 4418        | 5083       | 0.0795                            | 0.0039    | 0.5314                           | 0.0238    | 0.0484                           | 0.0007    | 295                              | 5         | rim      |
| 18CA11@02      | 1124        | 0.9  | 4812        | 5405       | 0.0612                            | 0.0029    | 0.3966                           | 0.0179    | 0.0469                           | 0.0007    | 292                              | 4         | rim      |
| 18CA11@03      | 1471        | 1.0  | 4425        | 4650       | 0.0903                            | 0.0071    | 0.6032                           | 0.0480    | 0.0483                           | 0.0008    | 290                              | 6         | rim      |
| 18CA11@04      | 547         | 0.7  | 2604        | 3481       | 0.0564                            | 0.0024    | 0.3640                           | 0.0166    | 0.0467                           | 0.0009    | 292                              | 6         | rim      |
| 18CA11@05      | 1347        | 1.1  | 5886        | 5448       | 0.0695                            | 0.0033    | 0.4519                           | 0.0252    | 0.0468                           | 0.0010    | 289                              | 6         | rim      |
| 18CA11@06      | 2028        | 1.3  | 9386        | 7448       | 0.0629                            | 0.0028    | 0.4143                           | 0.0187    | 0.0476                           | 0.0007    | 296                              | 4         | rim      |
| 18CA11@07      | 1184        | 1.1  | 6032        | 5422       | 0.0549                            | 0.0020    | 0.3512                           | 0.0137    | 0.0461                           | 0.0008    | 290                              | 5         | rim      |
| 18CA11@08      | 1463        | 1.2  | 6818        | 5879       | 0.0603                            | 0.0023    | 0.3946                           | 0.0174    | 0.0471                           | 0.0011    | 294                              | 7         | rim      |
| 18CA11@09      | 1512        | 1.1  | 7297        | 6702       | 0.0529                            | 0.0020    | 0.3501                           | 0.0134    | 0.0478                           | 0.0008    | 301                              | 5         | rim      |
| 18CA11@10      | 1002        | 1.0  | 4780        | 4870       | 0.0568                            | 0.0023    | 0.3634                           | 0.0140    | 0.0463                           | 0.0009    | 290                              | 6         | rim      |
| 18CA11@11      | 2016        | 1.1  | 7200        | 6460       | 0.0795                            | 0.0039    | 0.5185                           | 0.0279    | 0.0469                           | 0.0011    | 285                              | 7         | rim      |
| 18CA11@12      | 868         | 1.0  | 3513        | 3591       | 0.0688                            | 0.0040    | 0.4516                           | 0.0300    | 0.0469                           | 0.0012    | 290                              | 7         | rim      |
| 18CA11@13      | 1125        | 1.0  | 5896        | 5669       | 0.0532                            | 0.0022    | 0.3413                           | 0.0141    | 0.0464                           | 0.0008    | 292                              | 5         | rim      |
| 18CA11@14      | 1377        | 1.2  | 6514        | 5375       | 0.0665                            | 0.0030    | 0.4310                           | 0.0246    | 0.0464                           | 0.0011    | 287                              | 7         | rim      |
| 18CA11@15      | 64          | 0.6  | 274         | 427        | 0.0561                            | 0.0055    | 0.3520                           | 0.0322    | 0.0459                           | 0.0011    | 288                              | 7         | rim      |
| 18CA11@16      | 1062        | 0.9  | 3843        | 4224       | 0.0735                            | 0.0031    | 0.4914                           | 0.0215    | 0.0483                           | 0.0008    | 296                              | 5         | rim      |
| 18CA11@17      | 1186        | 1.0  | 4481        | 4584       | 0.0719                            | 0.0026    | 0.4781                           | 0.0175    | 0.0481                           | 0.0007    | 296                              | 4         | rim      |
| 18CA11@18      | 1073        | 0.9  | 4746        | 5257       | 0.0599                            | 0.0021    | 0.3877                           | 0.0139    | 0.0469                           | 0.0007    | 293                              | 4         | rim      |
| 18CA11@19      | 427         | 1.1  | 2323        | 2195       | 0.0536                            | 0.0028    | 0.3544                           | 0.0186    | 0.0475                           | 0.0012    | 299                              | 7         | rim      |
| 18CA11@20      | 71          | 0.2  | 6           | 30         | 0.5659                            | 0.0406    | 9.0236                           | 0.6099    | 0.1170                           | 0.0050    | 274                              | 48        | rim      |
| 18CA11@21      | 150         | 0.6  | 693         | 1104       | 0.0555                            | 0.0031    | 0.3667                           | 0.0199    | 0.0475                           | 0.0008    | 298                              | 5         | rim      |
| 18CA11@22      | 183         | 0.2  | 23          | 117        | 0.4543                            | 0.0243    | 6.0084                           | 0.3301    | 0.0957                           | 0.0031    | 306                              | 29        | rim      |
| 18CA11@23      | 36          | 0.9  | 41          | 45         | 0.3047                            | 0.0286    | 2.6275                           | 0.2124    | 0.0648                           | 0.0032    | 282                              | 21        | rim      |
| 18CA11@24      | 193         | 0.8  | 1072        | 1275       | 0.0541                            | 0.0029    | 0.3436                           | 0.0177    | 0.0458                           | 0.0010    | 288                              | 6         | rim      |
| 18CA11@25      | 264         | 1.0  | 1406        | 1421       | 0.0551                            | 0.0027    | 0.3620                           | 0.0169    | 0.0474                           | 0.0008    | 297                              | 5         | rim      |
| 18CA11@26      | 467         | 0.8  | 1100        | 1419       | 0.1531                            | 0.0215    | 1.3489                           | 0.2335    | 0.0559                           | 0.0028    | 309                              | 18        | rim      |
| 18CA11@27      | 213         | 0.8  | 1082        | 1384       | 0.0576                            | 0.0029    | 0.3763                           | 0.0189    | 0.0471                           | 0.0009    | 295                              | 6         | rim      |
| 18CA11@28      | 157         | 0.8  | 793         | 1041       | 0.0538                            | 0.0032    | 0.3558                           | 0.0209    | 0.0478                           | 0.0010    | 300                              | 6         | rim      |



|           |       |     |      |      |        |        |         |        |        |        |     |    |     |
|-----------|-------|-----|------|------|--------|--------|---------|--------|--------|--------|-----|----|-----|
| 18CA11@29 | 65    | 1.6 | 71   | 44   | 0.4258 | 0.0371 | 4.9131  | 0.4297 | 0.0847 | 0.0043 | 290 | 32 | rim |
| 18CA11@30 | 187   | 0.8 | 737  | 959  | 0.0755 | 0.0050 | 0.4998  | 0.0361 | 0.0474 | 0.0011 | 290 | 7  | rim |
| 18CA11@31 | 26    | 0.2 | 79   | 432  | 0.0525 | 0.0046 | 0.3393  | 0.0291 | 0.0469 | 0.0011 | 295 | 7  | rim |
| 18CA11@32 | 208   | 0.7 | 1046 | 1533 | 0.0599 | 0.0037 | 0.3862  | 0.0265 | 0.0462 | 0.0010 | 288 | 7  | rim |
| 18CA90@01 | 459   | 0.8 | 1996 | 2391 | 0.0610 | 0.0038 | 0.4108  | 0.0233 | 0.0490 | 0.0008 | 305 | 5  | rim |
| 18CA90@02 | 4297  | 1.4 | 4012 | 2886 | 0.4797 | 0.0158 | 6.0787  | 0.2242 | 0.0913 | 0.0018 | 295 | 15 | rim |
| 18CA90@03 | 8778  | 2.2 | 7487 | 3424 | 0.5999 | 0.0206 | 10.2399 | 0.4118 | 0.1228 | 0.0028 | 290 | 26 | rim |
| 18CA90@04 | 14509 | 2.2 | 7361 | 3415 | 0.6685 | 0.0282 | 16.9074 | 0.8942 | 0.1812 | 0.0061 | 338 | 48 | rim |
| 18CA90@05 | 2256  | 1.1 | 2665 | 2320 | 0.3493 | 0.0183 | 3.6638  | 0.2435 | 0.0746 | 0.0020 | 310 | 14 | rim |
| 18CA90@06 | 3911  | 1.4 | 5121 | 3688 | 0.3920 | 0.0282 | 4.6955  | 0.4851 | 0.0814 | 0.0039 | 313 | 23 | rim |
| 18CA90@07 | 1602  | 0.9 | 2023 | 2249 | 0.2865 | 0.0185 | 2.8094  | 0.2803 | 0.0678 | 0.0029 | 312 | 16 | rim |
| 18CA90@08 | 11464 | 1.7 | 4789 | 2780 | 0.6796 | 0.0209 | 17.9362 | 0.8485 | 0.1896 | 0.0065 | 338 | 44 | rim |
| 18CA90@09 | 4908  | 1.3 | 3261 | 2557 | 0.5217 | 0.0198 | 7.8200  | 0.4636 | 0.1071 | 0.0035 | 313 | 22 | rim |
| 18CA90@10 | 6886  | 1.3 | 4266 | 3172 | 0.5810 | 0.0199 | 9.3696  | 0.3382 | 0.1165 | 0.0022 | 291 | 23 | rim |
| 18CA90@11 | 1020  | 0.8 | 1722 | 2251 | 0.2041 | 0.0271 | 1.8543  | 0.3038 | 0.0591 | 0.0026 | 307 | 18 | rim |
| 18CA90@12 | 229   | 0.6 | 1026 | 1589 | 0.0584 | 0.0036 | 0.3813  | 0.0234 | 0.0472 | 0.0008 | 295 | 5  | rim |
| 18CA90@13 | 739   | 0.8 | 1502 | 1786 | 0.2032 | 0.0264 | 1.9365  | 0.3349 | 0.0604 | 0.0034 | 315 | 21 | rim |
| 18CA90@14 | 522   | 0.6 | 923  | 1435 | 0.1432 | 0.0264 | 1.2470  | 0.2892 | 0.0548 | 0.0023 | 309 | 17 | rim |
| 18CA90@15 | 2446  | 1.0 | 3001 | 3053 | 0.3198 | 0.0144 | 3.1854  | 0.1735 | 0.0715 | 0.0015 | 313 | 11 | rim |
| 18CA90@16 | 876   | 0.8 | 1972 | 2334 | 0.1731 | 0.0225 | 1.4482  | 0.2967 | 0.0541 | 0.0025 | 294 | 16 | rim |
| 18CA90@17 | 245   | 0.7 | 955  | 1419 | 0.0678 | 0.0044 | 0.4600  | 0.0292 | 0.0492 | 0.0009 | 304 | 6  | rim |
| 18CA90@18 | 1595  | 0.9 | 2393 | 2743 | 0.2337 | 0.0184 | 2.0287  | 0.2081 | 0.0605 | 0.0018 | 302 | 12 | rim |
| 18CA90@19 | 15028 | 2.4 | 6920 | 2848 | 0.7259 | 0.0211 | 22.7065 | 1.2209 | 0.2248 | 0.0098 | 326 | 54 | rim |
| 18CA90@20 | 466   | 0.7 | 1742 | 2459 | 0.0734 | 0.0045 | 0.5071  | 0.0304 | 0.0499 | 0.0009 | 307 | 6  | rim |
| 18CA90@21 | 8952  | 2.7 | 7770 | 2833 | 0.6619 | 0.0187 | 13.7868 | 0.4882 | 0.1498 | 0.0035 | 287 | 31 | rim |
| 18CA90@22 | 389   | 1.0 | 665  | 678  | 0.2366 | 0.0149 | 1.9558  | 0.1327 | 0.0588 | 0.0015 | 292 | 10 | rim |
| 18CA90@23 | 87    | 0.1 | 5    | 34   | 0.5963 | 0.0412 | 9.7981  | 0.6050 | 0.1207 | 0.0050 | 288 | 41 | rim |
| 18CA90@24 | 190   | 0.9 | 970  | 1096 | 0.0565 | 0.0037 | 0.3833  | 0.0233 | 0.0488 | 0.0010 | 306 | 7  | rim |
| 18CA90@25 | 2072  | 1.3 | 1147 | 880  | 0.5468 | 0.0368 | 9.2806  | 0.8040 | 0.1165 | 0.0067 | 319 | 39 | rim |
| 18CA90@26 | 415   | 1.0 | 1031 | 1020 | 0.1663 | 0.0099 | 1.2325  | 0.0722 | 0.0532 | 0.0010 | 292 | 7  | rim |
| 18CA90@27 | 5200  | 2.1 | 2709 | 1320 | 0.6397 | 0.0305 | 14.6615 | 1.2006 | 0.1601 | 0.0090 | 331 | 47 | rim |
| 18CA90@28 | 8     | 0.6 | 41   | 72   | 0.0553 | 0.0106 | 0.3438  | 0.0535 | 0.0473 | 0.0018 | 297 | 12 | rim |
| 18CA90@29 | 90    | 0.6 | 394  | 608  | 0.0572 | 0.0036 | 0.3907  | 0.0237 | 0.0491 | 0.0009 | 308 | 6  | rim |

|           |     |     |      |      |        |        |        |        |        |        |     |    |     |
|-----------|-----|-----|------|------|--------|--------|--------|--------|--------|--------|-----|----|-----|
| 18CA90@30 | 347 | 0.9 | 1121 | 1201 | 0.1054 | 0.0086 | 0.7599 | 0.0628 | 0.0518 | 0.0009 | 307 | 6  | rim |
| 18CA90@31 | 283 | 0.9 | 906  | 1033 | 0.1130 | 0.0090 | 0.8281 | 0.0805 | 0.0515 | 0.0014 | 302 | 9  | rim |
| 18CA90@32 | 452 | 1.0 | 1090 | 1130 | 0.1715 | 0.0135 | 1.3422 | 0.1226 | 0.0551 | 0.0016 | 300 | 10 | rim |

TABLE A4 (CONTINUED)

| Analytical No. | Total Pb (ppm) | Th/U | Th (ppm) | U (ppm) | Isotope ratios                    |           |                                  |           |                                  |           | Age(Ma)                           |           |                                  |           |                                  |           | Position |
|----------------|----------------|------|----------|---------|-----------------------------------|-----------|----------------------------------|-----------|----------------------------------|-----------|-----------------------------------|-----------|----------------------------------|-----------|----------------------------------|-----------|----------|
|                |                |      |          |         | $^{207}\text{Pb}/^{206}\text{Pb}$ | $2\sigma$ | $^{207}\text{Pb}/^{235}\text{U}$ | $2\sigma$ | $^{206}\text{Pb}/^{238}\text{U}$ | $2\sigma$ | $^{207}\text{Pb}/^{206}\text{Pb}$ | $2\sigma$ | $^{207}\text{Pb}/^{235}\text{U}$ | $2\sigma$ | $^{206}\text{Pb}/^{238}\text{U}$ | $2\sigma$ |          |
| 18CA91@1       | 309            | 0.9  | 1631     | 1812    | 0.0575                            | 0.0028    | 0.3726                           | 0.0195    | 0.0468                           | 0.0011    | 509                               | 107       | 322                              | 14        | 295                              | 7         | rim      |
| 18CA91@2       | 28             | 0.7  | 89.1     | 135     | 0.0579                            | 0.0068    | 0.5194                           | 0.0580    | 0.0655                           | 0.0019    | 528                               | 256       | 425                              | 39        | 409                              | 12        | rim      |
| 18CA91@3       | 43             | 0.9  | 156      | 180     | 0.0602                            | 0.0059    | 0.5541                           | 0.0542    | 0.0669                           | 0.0020    | 613                               | 213       | 448                              | 35        | 418                              | 12        | rim      |
| 18CA91@4       | 36             | 0.7  | 135      | 187     | 0.0584                            | 0.0056    | 0.5219                           | 0.0473    | 0.0650                           | 0.0017    | 546                               | 217       | 426                              | 32        | 406                              | 10        | rim      |
| 18CA91@5       | 46             | 0.8  | 184      | 242     | 0.0566                            | 0.0050    | 0.5084                           | 0.0434    | 0.0652                           | 0.0015    | 476                               | 193       | 417                              | 29        | 407                              | 9         | rim      |
| 18CA91@6       | 31             | 0.8  | 120      | 158     | 0.0564                            | 0.0063    | 0.5121                           | 0.0540    | 0.0663                           | 0.0018    | 465                               | 243       | 420                              | 36        | 414                              | 11        | rim      |
| 18CA91@7       | 71             | 0.5  | 264      | 525     | 0.0538                            | 0.0029    | 0.4389                           | 0.0232    | 0.0590                           | 0.0010    | 361                               | 122       | 370                              | 16        | 369                              | 6         | rim      |
| 18CA91@8       | 309            | 0.9  | 1739     | 2030    | 0.0519                            | 0.0023    | 0.3300                           | 0.0160    | 0.0459                           | 0.0010    | 280                               | 104       | 290                              | 12        | 289                              | 6         | rim      |
| 18CA91@9       | 123            | 0.6  | 657      | 1029    | 0.0539                            | 0.0031    | 0.3368                           | 0.0208    | 0.0451                           | 0.0009    | 369                               | 130       | 295                              | 16        | 284                              | 6         | rim      |
| 18CA91@10      | 684            | 0.9  | 3432     | 3903    | 0.0527                            | 0.0025    | 0.3435                           | 0.0164    | 0.0472                           | 0.0007    | 317                               | 107       | 300                              | 12        | 297                              | 5         | rim      |
| 18CA91@11      | 39             | 0.6  | 137      | 220     | 0.0559                            | 0.0047    | 0.5090                           | 0.0423    | 0.0664                           | 0.0016    | 450                               | 185       | 418                              | 28        | 414                              | 9         | rim      |
| 18CA91@12      | 80             | 0.8  | 316      | 390     | 0.0548                            | 0.0041    | 0.4855                           | 0.0343    | 0.0644                           | 0.0013    | 467                               | 161       | 402                              | 23        | 402                              | 8         | rim      |
| 18CA91@13      | 13             | 0.7  | 42.2     | 58.9    | 0.0545                            | 0.0093    | 0.4594                           | 0.0728    | 0.0618                           | 0.0024    | 394                               | 389       | 384                              | 51        | 386                              | 15        | rim      |
| 18CA91@14      | 54             | 1.0  | 208      | 206     | 0.0556                            | 0.0048    | 0.5151                           | 0.0430    | 0.0671                           | 0.0017    | 439                               | 193       | 422                              | 29        | 419                              | 10        | rim      |
| 18CA91@15      | 30             | 0.6  | 99.1     | 163     | 0.0554                            | 0.0049    | 0.4937                           | 0.0408    | 0.0652                           | 0.0015    | 428                               | 200       | 407                              | 28        | 407                              | 9         | rim      |
| 18CA91@16      | 72             | 0.7  | 221      | 317     | 0.0617                            | 0.0044    | 0.5949                           | 0.0444    | 0.0696                           | 0.0015    | 665                               | 156       | 474                              | 28        | 433                              | 9         | rim      |
| 18CA91@17      | 341            | 0.8  | 1630     | 1972    | 0.0556                            | 0.0023    | 0.3512                           | 0.0149    | 0.0457                           | 0.0007    | 435                               | 93        | 306                              | 11        | 288                              | 4         | rim      |
| 18CA91@18      | 28             | 0.9  | 93.2     | 109     | 0.0549                            | 0.0062    | 0.4941                           | 0.0582    | 0.0654                           | 0.0017    | 409                               | 256       | 408                              | 40        | 408                              | 10        | rim      |
| 18CA91@19      | 254            | 0.8  | 1220     | 1577    | 0.0513                            | 0.0027    | 0.3342                           | 0.0186    | 0.0469                           | 0.0009    | 254                               | 128       | 293                              | 14        | 296                              | 5         | rim      |
| 18CA91@20      | 66             | 0.5  | 188      | 350     | 0.0583                            | 0.0034    | 0.5474                           | 0.0313    | 0.0680                           | 0.0013    | 543                               | 130       | 443                              | 21        | 424                              | 8         | rim      |
| 18CA91@21      | 248            | 0.8  | 1217     | 1590    | 0.0539                            | 0.0022    | 0.3363                           | 0.0148    | 0.0451                           | 0.0008    | 369                               | 93        | 294                              | 11        | 284                              | 5         | rim      |
| 18CA91@22      | 49             | 0.7  | 168      | 247     | 0.0541                            | 0.0038    | 0.4786                           | 0.0338    | 0.0642                           | 0.0011    | 376                               | 159       | 397                              | 23        | 401                              | 7         | rim      |
| 18CA91@23      | 61             | 0.5  | 252      | 521     | 0.0540                            | 0.0032    | 0.3429                           | 0.0198    | 0.0461                           | 0.0007    | 369                               | 137       | 299                              | 15        | 291                              | 4         | rim      |
| 18CA91@24      | 269            | 0.8  | 1335     | 1620    | 0.0542                            | 0.0021    | 0.3396                           | 0.0134    | 0.0453                           | 0.0006    | 389                               | 76        | 297                              | 10        | 286                              | 4         | rim      |

|                      |                |                |                |                 |                   |                   |                   |                   |                   |                   |                |               |                |               |                |              |                |
|----------------------|----------------|----------------|----------------|-----------------|-------------------|-------------------|-------------------|-------------------|-------------------|-------------------|----------------|---------------|----------------|---------------|----------------|--------------|----------------|
| 18CA91@25            | 261            | 0.8            | 1227           | 1546            | 0.0527            | 0.0024            | 0.3449            | 0.0156            | 0.0473            | 0.0008            | 322            | 104           | 301            | 12            | 298            | 5            | rim            |
| 18CA91@26            | 488            | 1.1            | 2535           | 2348            | 0.0525            | 0.0020            | 0.3384            | 0.0129            | 0.0465            | 0.0006            | 309            | 89            | 296            | 10            | 293            | 4            | rim            |
| <del>18CA91@27</del> | <del>197</del> | <del>0.6</del> | <del>791</del> | <del>1227</del> | <del>0.0555</del> | <del>0.0025</del> | <del>0.3825</del> | <del>0.0176</del> | <del>0.0499</del> | <del>0.0009</del> | <del>432</del> | <del>91</del> | <del>329</del> | <del>13</del> | <del>314</del> | <del>6</del> | <del>rim</del> |
| 18CA83@01            | 88             | 0.3            | 364            | 1212            | 0.0564            | 0.0033            | 0.3409            | 0.0194            | 0.0437            | 0.0010            | 478            | 65            | 298            | 15            | 275            | 6            | rim            |
| 18CA83@02            | 69             | 0.5            | 412            | 846             | 0.0517            | 0.0042            | 0.2992            | 0.0238            | 0.0419            | 0.0010            | 272            | 185           | 266            | 19            | 265            | 6            | rim            |
| 18CA83@03            | 65             | 0.4            | 322            | 790             | 0.0561            | 0.0044            | 0.3390            | 0.0255            | 0.0437            | 0.0009            | 457            | 174           | 296            | 19            | 276            | 6            | rim            |
| 18CA83@04            | 182            | 0.2            | 555            | 2514            | 0.0621            | 0.0030            | 0.3881            | 0.0178            | 0.0451            | 0.0010            | 680            | 100           | 333            | 13            | 284            | 6            | rim            |
| 18CA83@05            | 50             | 0.4            | 228            | 610             | 0.0521            | 0.0071            | 0.3259            | 0.0545            | 0.0441            | 0.0012            | 287            | 315           | 286            | 42            | 278            | 8            | rim            |
| 18CA83@07            | 46             | 0.6            | 320            | 492             | 0.0520            | 0.0058            | 0.3017            | 0.0322            | 0.0420            | 0.0013            | 287            | 256           | 268            | 25            | 265            | 8            | rim            |
| 18CA83@08            | 106            | 0.2            | 292            | 1563            | 0.0515            | 0.0030            | 0.3320            | 0.0195            | 0.0463            | 0.0012            | 261            | 133           | 291            | 15            | 292            | 7            | rim            |
| 18CA83@09            | 54             | 0.8            | 412            | 506             | 0.0533            | 0.0048            | 0.3212            | 0.0291            | 0.0435            | 0.0011            | 339            | 204           | 283            | 22            | 275            | 7            | rim            |
| 18CA83@10            | 79             | 0.3            | 350            | 1081            | 0.0535            | 0.0033            | 0.3144            | 0.0186            | 0.0423            | 0.0009            | 350            | 141           | 278            | 14            | 267            | 5            | rim            |
| 18CA83@11            | 835            | 0.7            | 3243           | 4513            | 0.0706            | 0.0030            | 0.7827            | 0.0388            | 0.0791            | 0.0017            | 944            | 87            | 587            | 22            | 491            | 10           | core           |
| 18CA83@12            | 70             | 0.4            | 339            | 857             | 0.0521            | 0.0034            | 0.3276            | 0.0211            | 0.0452            | 0.0011            | 300            | 148           | 288            | 16            | 285            | 7            | rim            |
| 18CA83@13            | 70             | 0.7            | 528            | 728             | 0.0516            | 0.0044            | 0.3102            | 0.0267            | 0.0433            | 0.0011            | 333            | 193           | 274            | 21            | 273            | 7            | rim            |
| 18CA83@14            | 84             | 0.4            | 488            | 1114            | 0.0590            | 0.0041            | 0.3814            | 0.0257            | 0.0467            | 0.0012            | 569            | 156           | 328            | 19            | 294            | 7            | rim            |
| 18CA83@15            | 67             | 0.5            | 381            | 784             | 0.0543            | 0.0039            | 0.3370            | 0.0243            | 0.0446            | 0.0009            | 383            | 163           | 295            | 18            | 281            | 6            | rim            |
| 18CA83@16            | 51             | 0.6            | 319            | 574             | 0.0556            | 0.0038            | 0.3410            | 0.0221            | 0.0445            | 0.0011            | 439            | 156           | 298            | 17            | 281            | 7            | rim            |
| 18CA83@17            | 62             | 0.5            | 323            | 649             | 0.0613            | 0.0050            | 0.3867            | 0.0302            | 0.0458            | 0.0010            | 650            | 178           | 332            | 22            | 289            | 6            | rim            |
| 18CA83@18            | 73             | 0.3            | 297            | 1037            | 0.0525            | 0.0030            | 0.3203            | 0.0181            | 0.0440            | 0.0008            | 306            | 133           | 282            | 14            | 277            | 5            | rim            |
| 18CA83@19            | 55             | 0.5            | 277            | 539             | 0.0552            | 0.0049            | 0.3436            | 0.0296            | 0.0453            | 0.0010            | 420            | 200           | 300            | 22            | 285            | 6            | rim            |
| 18CA83@20            | 121            | 0.2            | 373            | 1570            | 0.0524            | 0.0027            | 0.3251            | 0.0155            | 0.0450            | 0.0008            | 302            | 124           | 286            | 12            | 284            | 5            | rim            |
| 18CA83@21            | 106            | 0.2            | 329            | 1406            | 0.0501            | 0.0028            | 0.3175            | 0.0175            | 0.0460            | 0.0009            | 198            | 130           | 280            | 13            | 290            | 5            | rim            |
| 18CA83@22            | 73             | 0.6            | 389            | 682             | 0.0518            | 0.0038            | 0.3244            | 0.0225            | 0.0455            | 0.0010            | 280            | 172           | 285            | 17            | 287            | 6            | rim            |
| 18CA83@23            | 115            | 0.2            | 315            | 1590            | 0.0517            | 0.0028            | 0.3192            | 0.0173            | 0.0447            | 0.0008            | 272            | 122           | 281            | 13            | 282            | 5            | rim            |
| 18CA83@24            | 126            | 0.3            | 395            | 1509            | 0.0591            | 0.0041            | 0.3722            | 0.0279            | 0.0452            | 0.0009            | 572            | 161           | 321            | 21            | 285            | 6            | rim            |
| 18CA83@25            | 103            | 1.3            | 487            | 371             | 0.0602            | 0.0046            | 0.6803            | 0.0508            | 0.0819            | 0.0016            | 609            | 176           | 527            | 31            | 508            | 10           | core           |
| 18CA83@26            | 1245           | 0.8            | 3879           | 5068            | 0.0749            | 0.0030            | 0.8935            | 0.0358            | 0.0861            | 0.0013            | 1065           | 81            | 648            | 19            | 533            | 8            | core           |
| 18CA83@27            | 83             | 0.7            | 502            | 769             | 0.0538            | 0.0039            | 0.3321            | 0.0219            | 0.0453            | 0.0010            | 365            | 163           | 291            | 17            | 286            | 6            | rim            |
| 18CA83@29            | 58             | 0.5            | 306            | 605             | 0.0523            | 0.0042            | 0.3361            | 0.0280            | 0.0464            | 0.0009            | 298            | 176           | 294            | 21            | 292            | 6            | rim            |
| 18CA83@30            | 84             | 0.5            | 431            | 919             | 0.0514            | 0.0036            | 0.3185            | 0.0224            | 0.0449            | 0.0009            | 261            | 163           | 281            | 17            | 283            | 6            | rim            |

**TABLE S4.** LA-ICPMS MONAZITE U–PB DATA OF THE GRANITE DYKES FROM THE SOUTHERN CHINESE ALTAI.

| Analytical No. | Total Pb (ppm) | Th (ppm) | U (ppm) | Y (ppm) | Th/U | Isotope ratios                       |        |                                     |        |                                     |        | Age(Ma)                              |     |                                     |    |                                     |    |
|----------------|----------------|----------|---------|---------|------|--------------------------------------|--------|-------------------------------------|--------|-------------------------------------|--------|--------------------------------------|-----|-------------------------------------|----|-------------------------------------|----|
|                |                |          |         |         |      | <sup>207</sup> Pb/ <sup>206</sup> Pb | 2σ     | <sup>207</sup> Pb/ <sup>235</sup> U | 2σ     | <sup>206</sup> Pb/ <sup>238</sup> U | 2σ     | <sup>207</sup> Pb/ <sup>206</sup> Pb | 2σ  | <sup>207</sup> Pb/ <sup>235</sup> U | 2σ | <sup>206</sup> Pb/ <sup>238</sup> U | 2σ |
| 18CA59@01      | 1906           | 134345   | 10355   | 21795   | 13   | 0.0533                               | 0.0020 | 0.3109                              | 0.0119 | 0.0423                              | 0.0006 | 343                                  | 89  | 275                                 | 9  | 267                                 | 4  |
| 18CA59@02      | 1670           | 118858   | 7862    | 22152   | 15   | 0.0513                               | 0.0022 | 0.3051                              | 0.0126 | 0.0432                              | 0.0006 | 257                                  | 100 | 270                                 | 10 | 273                                 | 4  |
| 18CA59@03      | 1816           | 129062   | 9119    | 20309   | 14   | 0.0517                               | 0.0019 | 0.3029                              | 0.0115 | 0.0424                              | 0.0006 | 276                                  | 85  | 269                                 | 9  | 268                                 | 4  |
| 18CA59@04      | 1651           | 119119   | 7322    | 21295   | 16   | 0.0520                               | 0.0019 | 0.3081                              | 0.0116 | 0.0429                              | 0.0006 | 283                                  | 85  | 273                                 | 9  | 271                                 | 4  |
| 18CA59@05      | 1443           | 108727   | 5476    | 20677   | 20   | 0.0518                               | 0.0023 | 0.3027                              | 0.0132 | 0.0424                              | 0.0007 | 280                                  | 94  | 269                                 | 10 | 268                                 | 4  |
| 18CA59@06      | 2122           | 146075   | 10271   | 23501   | 14   | 0.0510                               | 0.0020 | 0.3044                              | 0.0117 | 0.0432                              | 0.0006 | 243                                  | 89  | 270                                 | 9  | 272                                 | 3  |
| 18CA59@07      | 2028           | 145536   | 9544    | 23548   | 15   | 0.0521                               | 0.0019 | 0.3021                              | 0.0104 | 0.0420                              | 0.0007 | 287                                  | 72  | 268                                 | 8  | 265                                 | 4  |
| 18CA59@08      | 1516           | 111010   | 6170    | 21394   | 18   | 0.0501                               | 0.0022 | 0.2955                              | 0.0125 | 0.0428                              | 0.0007 | 211                                  | 100 | 263                                 | 10 | 270                                 | 4  |
| 18CA59@09      | 1845           | 133338   | 8501    | 21828   | 16   | 0.0509                               | 0.0018 | 0.2955                              | 0.0109 | 0.0420                              | 0.0006 | 235                                  | 85  | 263                                 | 9  | 265                                 | 4  |
| 18CA59@10      | 1640           | 112312   | 8187    | 21541   | 14   | 0.0494                               | 0.0019 | 0.2896                              | 0.0111 | 0.0424                              | 0.0006 | 169                                  | 89  | 258                                 | 9  | 268                                 | 4  |
| 18CA59@11      | 1546           | 99667    | 8993    | 21743   | 11   | 0.0521                               | 0.0021 | 0.3076                              | 0.0124 | 0.0428                              | 0.0006 | 300                                  | 102 | 272                                 | 10 | 270                                 | 4  |
| 18CA59@12      | 1358           | 99317    | 5475    | 20520   | 18   | 0.0510                               | 0.0027 | 0.2985                              | 0.0159 | 0.0424                              | 0.0007 | 243                                  | 113 | 265                                 | 12 | 268                                 | 4  |
| 18CA59@14      | 1820           | 130654   | 8351    | 21686   | 16   | 0.0498                               | 0.0021 | 0.2894                              | 0.0127 | 0.0421                              | 0.0006 | 183                                  | 100 | 258                                 | 10 | 266                                 | 4  |
| 18CA59@15      | 1519           | 109393   | 6230    | 21057   | 18   | 0.0505                               | 0.0025 | 0.2940                              | 0.0144 | 0.0422                              | 0.0006 | 220                                  | 115 | 262                                 | 11 | 267                                 | 4  |
| 18CA59@16      | 1757           | 121652   | 9407    | 20792   | 13   | 0.0542                               | 0.0022 | 0.3167                              | 0.0140 | 0.0422                              | 0.0006 | 389                                  | 89  | 279                                 | 11 | 266                                 | 4  |
| 18CA59@17      | 1613           | 114478   | 7200    | 20850   | 16   | 0.0510                               | 0.0022 | 0.2971                              | 0.0128 | 0.0423                              | 0.0005 | 239                                  | 109 | 264                                 | 10 | 267                                 | 3  |
| 18CA59@18      | 1811           | 129784   | 9238    | 20738   | 14   | 0.0514                               | 0.0022 | 0.2956                              | 0.0126 | 0.0417                              | 0.0007 | 261                                  | 100 | 263                                 | 10 | 263                                 | 4  |
| 18CA59@19      | 1781           | 126204   | 9369    | 21362   | 13   | 0.0509                               | 0.0020 | 0.2968                              | 0.0117 | 0.0423                              | 0.0006 | 235                                  | 89  | 264                                 | 9  | 267                                 | 4  |
| 18CA59@20      | 1839           | 134427   | 7822    | 21606   | 17   | 0.0498                               | 0.0020 | 0.2905                              | 0.0117 | 0.0422                              | 0.0006 | 187                                  | 93  | 259                                 | 9  | 266                                 | 4  |
| 18CA59@21      | 1765           | 129705   | 8084    | 21485   | 16   | 0.0514                               | 0.0020 | 0.2941                              | 0.0110 | 0.0415                              | 0.0006 | 261                                  | 89  | 262                                 | 9  | 262                                 | 4  |
| 18CA59@22      | 1995           | 131189   | 11153   | 26067   | 12   | 0.0505                               | 0.0018 | 0.3023                              | 0.0111 | 0.0433                              | 0.0006 | 217                                  | 81  | 268                                 | 9  | 274                                 | 4  |
| 18CA59@23      | 1816           | 127336   | 8736    | 21440   | 15   | 0.0520                               | 0.0020 | 0.3020                              | 0.0118 | 0.0420                              | 0.0005 | 287                                  | 93  | 268                                 | 9  | 265                                 | 3  |
| 18CA59@24      | 1747           | 122603   | 8836    | 20914   | 14   | 0.0504                               | 0.0021 | 0.2951                              | 0.0119 | 0.0424                              | 0.0006 | 217                                  | 100 | 263                                 | 9  | 268                                 | 4  |
| 18CA59@25      | 2074           | 152982   | 10005   | 20256   | 15   | 0.0517                               | 0.0020 | 0.2956                              | 0.0115 | 0.0414                              | 0.0006 | 272                                  | 89  | 263                                 | 9  | 261                                 | 4  |
| 18CA59@26      | 1573           | 116877   | 6999    | 21473   | 17   | 0.0507                               | 0.0023 | 0.2926                              | 0.0128 | 0.0419                              | 0.0006 | 233                                  | 104 | 261                                 | 10 | 264                                 | 4  |
| 18CA59@27      | 1770           | 125934   | 8367    | 22721   | 15   | 0.0518                               | 0.0019 | 0.3055                              | 0.0116 | 0.0426                              | 0.0006 | 276                                  | 81  | 271                                 | 9  | 269                                 | 4  |
| 18CA59@28      | 1744           | 125523   | 8595    | 22781   | 15   | 0.0498                               | 0.0020 | 0.2898                              | 0.0121 | 0.0421                              | 0.0006 | 183                                  | 31  | 258                                 | 10 | 266                                 | 3  |
| 18CA59@29      | 1665           | 119024   | 8192    | 22113   | 15   | 0.0527                               | 0.0021 | 0.3052                              | 0.0118 | 0.0420                              | 0.0006 | 322                                  | 33  | 270                                 | 9  | 265                                 | 4  |
| 18CA59@30      | 1630           | 104373   | 10779   | 23120   | 10   | 0.0514                               | 0.0019 | 0.3059                              | 0.0112 | 0.0430                              | 0.0006 | 261                                  | 85  | 271                                 | 9  | 272                                 | 4  |

|           |      |        |       |       |    |        |        |        |        |        |        |     |     |     |    |     |   |
|-----------|------|--------|-------|-------|----|--------|--------|--------|--------|--------|--------|-----|-----|-----|----|-----|---|
| 18CA84@01 | 1139 | 47614  | 14179 | 32952 | 3  | 0.0517 | 0.0020 | 0.3004 | 0.0110 | 0.0421 | 0.0008 | 276 | 85  | 267 | 9  | 266 | 5 |
| 18CA84@02 | 1108 | 63018  | 9108  | 34996 | 7  | 0.0499 | 0.0021 | 0.2928 | 0.0123 | 0.0426 | 0.0011 | 191 | 96  | 261 | 10 | 269 | 7 |
| 18CA84@03 | 2074 | 144420 | 7331  | 22223 | 20 | 0.0514 | 0.0025 | 0.3214 | 0.0156 | 0.0453 | 0.0010 | 257 | 111 | 283 | 12 | 286 | 6 |
| 18CA84@04 | 1412 | 86557  | 8994  | 27379 | 10 | 0.0524 | 0.0021 | 0.3130 | 0.0122 | 0.0434 | 0.0010 | 302 | 93  | 277 | 9  | 274 | 6 |
| 18CA84@05 | 1612 | 123106 | 3592  | 18792 | 34 | 0.0516 | 0.0027 | 0.3159 | 0.0161 | 0.0445 | 0.0010 | 333 | 122 | 279 | 12 | 280 | 6 |
| 18CA84@07 | 1011 | 46980  | 10751 | 37758 | 4  | 0.0511 | 0.0020 | 0.3058 | 0.0123 | 0.0433 | 0.0010 | 243 | 89  | 271 | 10 | 274 | 6 |
| 18CA84@08 | 1233 | 68642  | 9531  | 32589 | 7  | 0.0520 | 0.0021 | 0.3146 | 0.0122 | 0.0441 | 0.0011 | 283 | 96  | 278 | 9  | 278 | 7 |
| 18CA84@09 | 1354 | 68614  | 13442 | 30944 | 5  | 0.0505 | 0.0017 | 0.3009 | 0.0100 | 0.0432 | 0.0009 | 220 | 69  | 267 | 8  | 272 | 5 |
| 18CA84@10 | 1449 | 73064  | 13615 | 27054 | 5  | 0.0509 | 0.0018 | 0.3067 | 0.0112 | 0.0436 | 0.0009 | 235 | 81  | 272 | 9  | 275 | 6 |
| 18CA84@11 | 1561 | 81620  | 14498 | 28186 | 6  | 0.0523 | 0.0020 | 0.3105 | 0.0117 | 0.0431 | 0.0010 | 298 | 85  | 275 | 9  | 272 | 6 |
| 18CA84@12 | 1363 | 84706  | 8395  | 23198 | 10 | 0.0513 | 0.0023 | 0.3064 | 0.0137 | 0.0434 | 0.0010 | 254 | 94  | 271 | 11 | 274 | 6 |
| 18CA84@13 | 2488 | 187320 | 7529  | 22333 | 25 | 0.0530 | 0.0024 | 0.3174 | 0.0141 | 0.0435 | 0.0010 | 328 | 100 | 280 | 11 | 275 | 6 |
| 18CA84@15 | 2517 | 182144 | 8409  | 20780 | 22 | 0.0503 | 0.0021 | 0.3075 | 0.0126 | 0.0444 | 0.0009 | 209 | 91  | 272 | 10 | 280 | 6 |
| 18CA84@16 | 1609 | 95181  | 11193 | 22907 | 9  | 0.0525 | 0.0020 | 0.3195 | 0.0126 | 0.0443 | 0.0011 | 306 | 89  | 282 | 10 | 279 | 7 |
| 18CA84@17 | 1345 | 94822  | 5534  | 21922 | 17 | 0.0524 | 0.0025 | 0.3170 | 0.0146 | 0.0441 | 0.0011 | 302 | 98  | 280 | 11 | 278 | 7 |
| 18CA84@18 | 1441 | 75074  | 13579 | 36130 | 6  | 0.0521 | 0.0019 | 0.3111 | 0.0113 | 0.0434 | 0.0009 | 300 | 76  | 275 | 9  | 274 | 5 |
| 18CA84@19 | 1300 | 76977  | 9407  | 28738 | 8  | 0.0522 | 0.0021 | 0.3117 | 0.0137 | 0.0433 | 0.0010 | 295 | 83  | 276 | 11 | 273 | 6 |
| 18CA84@21 | 2313 | 173268 | 7100  | 22409 | 24 | 0.0537 | 0.0022 | 0.3240 | 0.0124 | 0.0439 | 0.0009 | 367 | 144 | 285 | 10 | 277 | 5 |
| 18CA84@22 | 1060 | 57345  | 9065  | 25270 | 6  | 0.0526 | 0.0019 | 0.3167 | 0.0123 | 0.0436 | 0.0009 | 322 | 20  | 279 | 10 | 275 | 5 |
| 18CA84@23 | 1650 | 94180  | 13098 | 24871 | 7  | 0.0514 | 0.0018 | 0.3141 | 0.0118 | 0.0443 | 0.0011 | 261 | 78  | 277 | 9  | 279 | 7 |
| 18CA84@24 | 1175 | 65632  | 9337  | 24280 | 7  | 0.0523 | 0.0019 | 0.3203 | 0.0122 | 0.0444 | 0.0009 | 302 | 85  | 282 | 9  | 280 | 6 |
| 18CA66@01 | 1391 | 28108  | 27626 | 29592 | 1  | 0.0510 | 0.0017 | 0.2934 | 0.0095 | 0.0416 | 0.0007 | 239 | 65  | 261 | 7  | 263 | 4 |
| 18CA66@02 | 379  | 15108  | 5281  | 30661 | 3  | 0.0519 | 0.0023 | 0.3031 | 0.0133 | 0.0423 | 0.0007 | 283 | 100 | 269 | 10 | 267 | 5 |
| 18CA66@03 | 694  | 36962  | 7153  | 21360 | 5  | 0.0510 | 0.0021 | 0.2965 | 0.0120 | 0.0421 | 0.0006 | 239 | 96  | 264 | 9  | 266 | 4 |
| 18CA66@04 | 927  | 41691  | 11960 | 21381 | 3  | 0.0514 | 0.0017 | 0.2956 | 0.0097 | 0.0416 | 0.0006 | 261 | 78  | 263 | 8  | 263 | 3 |
| 18CA66@05 | 347  | 14124  | 4687  | 30578 | 3  | 0.0512 | 0.0024 | 0.2994 | 0.0137 | 0.0423 | 0.0006 | 250 | 104 | 266 | 11 | 267 | 4 |
| 18CA66@06 | 784  | 47399  | 6656  | 19995 | 7  | 0.0501 | 0.0021 | 0.2927 | 0.0124 | 0.0423 | 0.0007 | 198 | 106 | 261 | 10 | 267 | 4 |
| 18CA66@07 | 574  | 32080  | 5251  | 11140 | 6  | 0.0513 | 0.0024 | 0.2984 | 0.0138 | 0.0421 | 0.0007 | 254 | 107 | 265 | 11 | 266 | 4 |
| 18CA66@08 | 591  | 27484  | 7019  | 31998 | 4  | 0.0509 | 0.0022 | 0.2960 | 0.0121 | 0.0421 | 0.0006 | 235 | 100 | 263 | 9  | 266 | 4 |
| 18CA66@09 | 697  | 23677  | 10552 | 20494 | 2  | 0.0508 | 0.0018 | 0.2966 | 0.0103 | 0.0421 | 0.0006 | 232 | 81  | 264 | 8  | 266 | 4 |
| 18CA66@10 | 722  | 44858  | 5641  | 12934 | 8  | 0.0509 | 0.0024 | 0.2961 | 0.0136 | 0.0420 | 0.0006 | 235 | 98  | 263 | 11 | 265 | 4 |
| 18CA66@11 | 513  | 31568  | 3946  | 20607 | 8  | 0.0496 | 0.0027 | 0.2840 | 0.0150 | 0.0413 | 0.0007 | 176 | 117 | 254 | 12 | 261 | 4 |
| 18CA66@12 | 857  | 55947  | 5535  | 24171 | 10 | 0.0495 | 0.0024 | 0.2855 | 0.0130 | 0.0415 | 0.0006 | 172 | 111 | 255 | 10 | 262 | 4 |

|           |     |       |       |       |   |        |        |        |        |        |        |     |     |     |    |     |   |
|-----------|-----|-------|-------|-------|---|--------|--------|--------|--------|--------|--------|-----|-----|-----|----|-----|---|
| 18CA66@13 | 621 | 33063 | 6266  | 20929 | 5 | 0.0514 | 0.0026 | 0.2942 | 0.0137 | 0.0413 | 0.0006 | 261 | 106 | 262 | 11 | 261 | 4 |
| 18CA66@14 | 777 | 41914 | 7734  | 25087 | 5 | 0.0497 | 0.0023 | 0.2909 | 0.0129 | 0.0422 | 0.0006 | 189 | 111 | 259 | 10 | 267 | 4 |
| 18CA66@15 | 920 | 40266 | 11350 | 31241 | 4 | 0.0515 | 0.0019 | 0.3025 | 0.0113 | 0.0423 | 0.0006 | 261 | 85  | 268 | 9  | 267 | 4 |
| 18CA66@16 | 661 | 20992 | 10276 | 19104 | 2 | 0.0500 | 0.0019 | 0.2955 | 0.0107 | 0.0426 | 0.0006 | 198 | 85  | 263 | 8  | 269 | 3 |
| 18CA66@17 | 447 | 13789 | 7220  | 27298 | 2 | 0.0531 | 0.0021 | 0.3089 | 0.0120 | 0.0420 | 0.0006 | 332 | 89  | 273 | 9  | 265 | 4 |
| 18CA66@18 | 804 | 33378 | 10770 | 21083 | 3 | 0.0529 | 0.0021 | 0.3077 | 0.0127 | 0.0419 | 0.0006 | 324 | 89  | 272 | 10 | 265 | 4 |
| 18CA66@19 | 665 | 31128 | 7945  | 35867 | 4 | 0.0519 | 0.0020 | 0.3045 | 0.0116 | 0.0424 | 0.0007 | 283 | 85  | 270 | 9  | 267 | 4 |
| 18CA66@20 | 830 | 42944 | 9137  | 27165 | 5 | 0.0508 | 0.0018 | 0.2906 | 0.0105 | 0.0413 | 0.0006 | 232 | 81  | 259 | 8  | 261 | 4 |
| 18CA66@21 | 536 | 27551 | 5599  | 22409 | 5 | 0.0513 | 0.0021 | 0.2986 | 0.0119 | 0.0421 | 0.0007 | 254 | 87  | 265 | 9  | 266 | 4 |
| 18CA66@22 | 785 | 38505 | 8850  | 27447 | 4 | 0.0517 | 0.0019 | 0.2982 | 0.0108 | 0.0416 | 0.0007 | 272 | 94  | 265 | 8  | 263 | 4 |
| 18CA66@23 | 786 | 20293 | 13935 | 17770 | 1 | 0.0513 | 0.0018 | 0.2968 | 0.0105 | 0.0417 | 0.0007 | 254 | 81  | 264 | 8  | 263 | 5 |
| 18CA66@24 | 925 | 43495 | 11078 | 31410 | 4 | 0.0514 | 0.0019 | 0.2956 | 0.0109 | 0.0414 | 0.0008 | 261 | 85  | 263 | 9  | 261 | 5 |
| 18CA66@25 | 603 | 34375 | 5258  | 8265  | 7 | 0.0500 | 0.0024 | 0.2870 | 0.0136 | 0.0413 | 0.0009 | 198 | 115 | 256 | 11 | 261 | 6 |
| 18CA66@26 | 349 | 8598  | 6312  | 30410 | 1 | 0.0527 | 0.0023 | 0.3028 | 0.0128 | 0.0414 | 0.0008 | 317 | 31  | 269 | 10 | 261 | 5 |
| 18CA66@27 | 469 | 20132 | 6174  | 24804 | 3 | 0.0523 | 0.0024 | 0.2976 | 0.0135 | 0.0410 | 0.0008 | 298 | 94  | 265 | 11 | 259 | 5 |
| 18CA66@28 | 450 | 24094 | 4260  | 27351 | 6 | 0.0511 | 0.0026 | 0.2957 | 0.0137 | 0.0419 | 0.0008 | 256 | 115 | 263 | 11 | 265 | 5 |
| 18CA66@29 | 595 | 30506 | 6382  | 21377 | 5 | 0.0530 | 0.0021 | 0.3069 | 0.0118 | 0.0418 | 0.0006 | 328 | 89  | 272 | 9  | 264 | 4 |
| 18CA66@30 | 260 | 8578  | 4038  | 20251 | 2 | 0.0513 | 0.0024 | 0.3020 | 0.0143 | 0.0425 | 0.0007 | 254 | 107 | 268 | 11 | 268 | 4 |

---

TABLE S5. MONAZITE COMPOSITION OF THE STUDIED GRANITES FROM THE SOUTHERN CHINESE ALTAI

| Spot       | SiO <sub>2</sub><br>(wt.%) | P <sub>2</sub> O <sub>5</sub><br>(wt.%) | La     | Ce     | Pr    | Nd     | Sm    | Eu      | Gd    | Tb   | Dy    | Ho   |
|------------|----------------------------|-----------------------------------------|--------|--------|-------|--------|-------|---------|-------|------|-------|------|
| 18CA59@-01 | 0.87                       | 25.1                                    | 89076  | 191923 | 24287 | 95751  | 29769 | 936.98  | 18761 | 2286 | 8460  | 909  |
| 18CA59@-02 | 0.00                       | 24.8                                    | 91711  | 203157 | 25741 | 104597 | 31348 | 910.01  | 19921 | 2377 | 8746  | 961  |
| 18CA59@-03 | 0.33                       | 24.9                                    | 92919  | 198117 | 24815 | 99212  | 30652 | 927.99  | 18540 | 2237 | 8101  | 867  |
| 18CA59@-04 | 1.01                       | 24.5                                    | 89796  | 201063 | 25750 | 103896 | 31687 | 919.04  | 19783 | 2358 | 8547  | 922  |
| 18CA59@-05 | 0.61                       | 24.4                                    | 96694  | 211831 | 26469 | 107080 | 29469 | 799.94  | 18618 | 2180 | 8082  | 902  |
| 18CA59@-06 | 0.65                       | 25.0                                    | 80978  | 183083 | 23667 | 96808  | 31934 | 999.20  | 20429 | 2525 | 9272  | 1016 |
| 18CA59@-07 | 0.78                       | 24.9                                    | 79599  | 182161 | 23907 | 99004  | 32837 | 964.20  | 20802 | 2512 | 9277  | 1010 |
| 18CA59@-08 | 0.28                       | 24.5                                    | 95066  | 208751 | 26274 | 107799 | 30366 | 869.77  | 19436 | 2274 | 8413  | 954  |
| 18CA59@-09 | 1.46                       | 24.4                                    | 83199  | 190259 | 24888 | 101665 | 32494 | 959.31  | 20250 | 2468 | 8816  | 946  |
| 18CA59@-10 | 0.52                       | 25.1                                    | 93677  | 205397 | 25626 | 101654 | 30964 | 928.20  | 19418 | 2318 | 8546  | 940  |
| 18CA59@-11 | 0.69                       | 25.4                                    | 95583  | 208700 | 25639 | 102313 | 31694 | 952.83  | 19788 | 2383 | 8680  | 940  |
| 18CA59@-12 | 1.99                       | 24.5                                    | 96269  | 211563 | 26309 | 105746 | 28986 | 769.73  | 18607 | 2145 | 7999  | 908  |
| 18CA59@-13 | 1.37                       | 24.5                                    | 92366  | 198408 | 25298 | 102428 | 32097 | 936.97  | 19730 | 2335 | 8531  | 904  |
| 18CA59@-14 | 0.41                       | 24.9                                    | 86261  | 193054 | 25057 | 102877 | 33054 | 967.52  | 20574 | 2428 | 8787  | 953  |
| 18CA59@-15 | 0.98                       | 24.7                                    | 93432  | 207738 | 26013 | 106129 | 29966 | 847.74  | 19268 | 2247 | 8305  | 942  |
| 18CA59@-16 | 0.26                       | 25.0                                    | 97015  | 204494 | 25209 | 97567  | 27715 | 1112.43 | 17972 | 2152 | 8136  | 919  |
| 18CA59@-17 | 0.61                       | 24.8                                    | 92773  | 206239 | 25897 | 103272 | 30924 | 863.24  | 19462 | 2301 | 8473  | 909  |
| 18CA59@-18 | 0.88                       | 24.5                                    | 92073  | 198002 | 24728 | 97168  | 30132 | 902.68  | 19129 | 2280 | 8257  | 898  |
| 18CA59@-19 | 1.12                       | 24.3                                    | 92021  | 198362 | 24693 | 97836  | 30801 | 920.02  | 19379 | 2361 | 8563  | 940  |
| 18CA59@-20 | 1.28                       | 24.1                                    | 85976  | 195024 | 24797 | 101165 | 30515 | 875.58  | 19647 | 2350 | 8562  | 946  |
| 18CA59@-21 | 0.70                       | 24.5                                    | 88309  | 195425 | 25205 | 102145 | 31763 | 922.74  | 19939 | 2397 | 8791  | 941  |
| 18CA59@-22 | 0.72                       | 25.3                                    | 82808  | 187373 | 23747 | 96169  | 31884 | 960.33  | 21315 | 2705 | 10092 | 1136 |
| 18CA59@-23 | 1.09                       | 25.1                                    | 89461  | 194981 | 24614 | 98025  | 30356 | 903.15  | 19124 | 2344 | 8610  | 941  |
| 18CA59@-24 | 0.45                       | 25.0                                    | 92657  | 201826 | 25329 | 98949  | 30836 | 918.26  | 18833 | 2279 | 8266  | 895  |
| 18CA59@-25 | 0.39                       | 24.4                                    | 89534  | 188745 | 23429 | 93993  | 29582 | 859.05  | 18332 | 2212 | 7998  | 871  |
| 18CA59@-26 | 0.95                       | 24.2                                    | 91799  | 204680 | 25830 | 104048 | 31540 | 871.23  | 19954 | 2350 | 8599  | 931  |
| 18CA59@-27 | 0.64                       | 25.0                                    | 85512  | 193881 | 25322 | 102345 | 32493 | 941.36  | 21136 | 2527 | 9210  | 987  |
| 18CA59@-28 | 0.60                       | 24.5                                    | 90622  | 199814 | 25212 | 99393  | 30622 | 917.01  | 19889 | 2446 | 9103  | 988  |
| 18CA59@-29 | 0.82                       | 24.8                                    | 89745  | 201983 | 25442 | 101136 | 31037 | 942.69  | 20048 | 2412 | 8778  | 939  |
| 18CA59@-30 | 0.98                       | 25.1                                    | 98053  | 206763 | 25204 | 96947  | 29222 | 903.31  | 18879 | 2377 | 8886  | 990  |
| 18CA66@01  | 0.035                      | 23.3                                    | 102042 | 239987 | 30506 | 120109 | 33942 | 5.98    | 21221 | 2506 | 9578  | 1118 |
| 18CA66@02  | 0.41                       | 22.6                                    | 86283  | 247367 | 35354 | 147709 | 44656 | 0.73    | 25003 | 2940 | 10552 | 1123 |
| 18CA66@03  | 1.03                       | 22.6                                    | 107373 | 253799 | 32190 | 127391 | 32138 | 2.11    | 19409 | 2065 | 7380  | 851  |
| 18CA66@04  | 0.23                       | 22.8                                    | 115236 | 250628 | 30657 | 120495 | 30832 | 3.31    | 19766 | 2120 | 7472  | 830  |
| 18CA66@05  | 0.65                       | 22.6                                    | 88984  | 249968 | 35307 | 152335 | 38075 | 0.84    | 22535 | 2578 | 9817  | 1184 |
| 18CA66@06  | 0.48                       | 22.5                                    | 100738 | 245834 | 32238 | 129922 | 38736 | 3.96    | 22536 | 2345 | 7718  | 776  |
| 18CA66@07  | 0.47                       | 22.7                                    | 93918  | 250643 | 34435 | 145080 | 49166 | 0.58    | 26571 | 2092 | 4884  | 363  |
| 18CA66@08  | 1.40                       | 21.9                                    | 80898  | 236737 | 34162 | 149511 | 41116 | 0.51    | 25741 | 2925 | 10722 | 1216 |
| 18CA66@09  |                            | 22.9                                    | 89426  | 248407 | 34851 | 145124 | 44143 | 2.27    | 27340 | 2774 | 8185  | 722  |
| 18CA66@10  | 1.60                       | 21.3                                    | 87376  | 244151 | 34368 | 146114 | 47145 | 0.87    | 26920 | 2235 | 5626  | 442  |
| 18CA66@11  | 0.65                       | 22.6                                    | 107950 | 258971 | 33322 | 134135 | 31936 | 1.20    | 19633 | 2003 | 7140  | 828  |
| 18CA66@12  | 1.45                       | 22.4                                    | 79045  | 213565 | 30337 | 130589 | 53375 | 2.24    | 40808 | 4006 | 10281 | 774  |
| 18CA66@13  | 0.35                       | 22.9                                    | 109470 | 257393 | 32596 | 129263 | 32728 | 1.89    | 20026 | 2094 | 7350  | 837  |
| 18CA66@14  | 0.40                       | 23.2                                    | 93762  | 238839 | 32522 | 137786 | 36849 | 2.56    | 22551 | 2348 | 8370  | 970  |
| 18CA66@15  | 0.88                       | 21.8                                    | 85973  | 237014 | 32964 | 140434 | 37792 | 0.87    | 23072 | 2662 | 10062 | 1208 |
| 18CA66@16  |                            | 22.8                                    | 89033  | 248390 | 35690 | 153621 | 44922 | 1.03    | 24264 | 2385 | 7285  | 639  |

|           |       |      |        |        |       |        |       |      |       |      |       |      |
|-----------|-------|------|--------|--------|-------|--------|-------|------|-------|------|-------|------|
| 18CA66@17 | 0.93  | 22.6 | 83979  | 247127 | 35405 | 152704 | 42456 | 1.59 | 25595 | 2836 | 9844  | 1052 |
| 18CA66@18 |       | 23.2 | 111379 | 255250 | 31827 | 125638 | 32747 | 3.86 | 19596 | 2116 | 7379  | 815  |
| 18CA66@19 | 0.84  | 21.9 | 80332  | 233172 | 33720 | 149681 | 40195 | 0.64 | 25409 | 2975 | 11623 | 1432 |
| 18CA66@20 | 0.70  | 21.5 | 90839  | 243223 | 33313 | 141409 | 37103 | 0.66 | 21987 | 2493 | 9186  | 1060 |
| 18CA66@21 | 0.84  | 22.0 | 87440  | 248729 | 35363 | 154309 | 40220 | 0.62 | 22459 | 2389 | 8272  | 888  |
| 18CA66@22 | 1.57  | 21.4 | 90679  | 242315 | 33382 | 142017 | 35630 | 1.29 | 21350 | 2400 | 9062  | 1101 |
| 18CA66@23 | 1.16  | 22.0 | 89693  | 254454 | 36463 | 150024 | 41021 | 0.88 | 19744 | 1991 | 6406  | 628  |
| 18CA66@24 | 1.66  | 21.2 | 85137  | 236065 | 32710 | 138598 | 37243 | 0.99 | 22884 | 2671 | 10257 | 1227 |
| 18CA66@25 | 0.71  | 22.5 | 81235  | 236391 | 34682 | 150601 | 64049 | 0.87 | 34376 | 2396 | 4406  | 252  |
| 18CA66@26 | 0.80  | 22.5 | 88784  | 249966 | 35167 | 147338 | 43728 | 0.70 | 25254 | 2868 | 10403 | 1147 |
| 18CA66@27 | 0.56  | 22.1 | 92905  | 257192 | 35770 | 148960 | 37308 | 0.71 | 21178 | 2330 | 8438  | 973  |
| 18CA66@28 | 1.13  | 22.5 | 85961  | 243432 | 34533 | 150964 | 40295 | 0.60 | 23923 | 2647 | 9580  | 1082 |
| 18CA66@29 | 0.24  | 22.5 | 118244 | 263734 | 32149 | 124096 | 30904 | 2.06 | 18398 | 1994 | 7312  | 868  |
| 18CA66@30 | 0.24  | 22.5 | 98049  | 268925 | 36413 | 148487 | 39669 | 0.96 | 21957 | 2310 | 7645  | 771  |
| 18CA84@01 | 1.04  | 18.5 | 64349  | 242794 | 38556 | 153701 | 48388 | 53.8 | 23363 | 2835 | 10589 | 1083 |
| 18CA84@02 | 0.42  | 18.4 | 64251  | 237953 | 36153 | 149385 | 51038 | 71.6 | 25761 | 3157 | 11414 | 1169 |
| 18CA84@03 | 1.19  | 19.0 | 71558  | 198628 | 28152 | 116592 | 52095 | 150  | 25095 | 2666 | 8766  | 838  |
| 18CA84@04 | 1.09  | 18.8 | 61447  | 228752 | 36743 | 145310 | 47730 | 72.8 | 23387 | 2668 | 9456  | 961  |
| 18CA84@05 | 1.61  | 17.6 | 102469 | 230826 | 29438 | 111946 | 36505 | 173  | 20411 | 2151 | 7298  | 734  |
| 18CA84@06 | 1.39  | 19.4 | 65209  | 225967 | 34507 | 137183 | 45063 | 70.1 | 25218 | 3395 | 13024 | 1496 |
| 18CA84@07 | 0.58  | 19.6 | 61339  | 232403 | 39337 | 155717 | 51270 | 79.4 | 24147 | 3052 | 10790 | 1155 |
| 18CA84@08 | 0.22  | 20.0 | 64328  | 229812 | 36376 | 146802 | 49021 | 77.8 | 24115 | 2915 | 10598 | 1114 |
| 18CA84@09 | 0.059 | 19.7 | 64021  | 234172 | 37611 | 145518 | 48950 | 119  | 22211 | 2862 | 10278 | 1056 |
| 18CA84@10 | 1.00  | 19.1 | 65209  | 231849 | 36586 | 147723 | 47363 | 63.6 | 21729 | 2554 | 9380  | 934  |
| 18CA84@11 | 1.32  | 19.3 | 72525  | 225061 | 33341 | 137175 | 42776 | 61.9 | 22935 | 2722 | 10113 | 1122 |
| 18CA84@12 | 0.55  | 19.9 | 65194  | 232589 | 36378 | 142348 | 49425 | 60.4 | 22498 | 2469 | 8074  | 732  |
| 18CA84@13 | 1.42  | 19.4 | 77515  | 175706 | 23635 | 91898  | 48897 | 188  | 25864 | 2759 | 9080  | 899  |
| 18CA84@14 | 2.08  | 18.8 | 84312  | 199340 | 26476 | 105877 | 41533 | 152  | 22226 | 2382 | 7988  | 771  |
| 18CA84@15 | 0.64  | 19.8 | 84088  | 195277 | 22212 | 86786  | 41845 | 221  | 23423 | 2614 | 8229  | 846  |
| 18CA84@16 | 1.03  | 20.0 | 66206  | 224761 | 33672 | 136617 | 46508 | 64.7 | 22072 | 2440 | 8525  | 827  |
| 18CA84@17 | 1.20  | 19.8 | 66361  | 232083 | 35756 | 141234 | 43271 | 65.6 | 20573 | 2185 | 7511  | 794  |
| 18CA84@18 | 0.77  | 20.5 | 58004  | 214300 | 33921 | 144433 | 48960 | 67.5 | 25022 | 3088 | 11880 | 1287 |
| 18CA84@19 | 1.24  | 20.5 | 62720  | 222326 | 35005 | 143888 | 46276 | 63.0 | 24078 | 2764 | 10200 | 1046 |
| 18CA84@20 | 1.97  | 19.8 | 67223  | 174001 | 23552 | 104071 | 52143 | 162  | 25511 | 2652 | 8625  | 874  |
| 18CA84@21 | 1.43  | 20.1 | 74480  | 178942 | 23490 | 98334  | 50218 | 182  | 26256 | 2827 | 8874  | 874  |
| 18CA84@22 | 0.59  | 21.0 | 60815  | 238020 | 36815 | 155196 | 49311 | 88.8 | 21509 | 2521 | 8666  | 841  |
| 18CA84@23 | 1.42  | 19.7 | 65399  | 222776 | 33811 | 143312 | 39494 | 62.6 | 20517 | 2292 | 8320  | 938  |
| 18CA84@24 | 0.88  | 21.7 | 69272  | 229339 | 36285 | 142389 | 47205 | 82.3 | 21564 | 2563 | 8831  | 843  |

TABLE A6 (CONTINUED)

| Spot       | Er   | Tm  | Yb  | Lu   | Hf   | Y     | Th     | U     | Eu/Eu* | ΣREE   | Th/U | (La/Yb) <sub>N</sub> |
|------------|------|-----|-----|------|------|-------|--------|-------|--------|--------|------|----------------------|
| 18CA59@-01 | 1561 | 176 | 854 | 82.7 | 0.49 | 21795 | 134345 | 10355 | 0.1212 | 464831 | 13.0 | 74.8                 |
| 18CA59@-02 | 1581 | 166 | 767 | 73.3 | 0.36 | 22152 | 118858 | 7862  | 0.1113 | 492056 | 15.1 | 85.8                 |
| 18CA59@-03 | 1453 | 160 | 799 | 77.3 | 0.40 | 20309 | 129062 | 9119  | 0.1190 | 478878 | 14.2 | 83.5                 |
| 18CA59@-04 | 1513 | 158 | 737 | 70.1 | 0.89 | 21295 | 119119 | 7322  | 0.1122 | 487199 | 16.3 | 87.4                 |
| 18CA59@-05 | 1511 | 151 | 685 | 64.1 | 0.69 | 20677 | 108727 | 5476  | 0.1044 | 504537 | 19.9 | 101.3                |
| 18CA59@-06 | 1698 | 187 | 909 | 85.3 | 0.58 | 23501 | 146075 | 10271 | 0.1196 | 453590 | 14.2 | 63.9                 |
| 18CA59@-07 | 1699 | 184 | 898 | 86.5 | 0.77 | 23548 | 145536 | 9544  | 0.1128 | 454940 | 15.2 | 63.6                 |
| 18CA59@-08 | 1563 | 162 | 741 | 70.4 | 0.75 | 21394 | 111010 | 6170  | 0.1095 | 502740 | 18.0 | 92.0                 |



|            |      |      |      |      |      |       |        |       |        |        |      |       |
|------------|------|------|------|------|------|-------|--------|-------|--------|--------|------|-------|
| 18CA59@-09 | 1576 | 169  | 808  | 76.1 | 0.67 | 21828 | 133338 | 8501  | 0.1143 | 468573 | 15.7 | 73.9  |
| 18CA59@-10 | 1543 | 167  | 771  | 73.7 | 0.73 | 21541 | 112312 | 8187  | 0.1157 | 492023 | 13.7 | 87.1  |
| 18CA59@-11 | 1573 | 169  | 823  | 78.6 | 0.77 | 21743 | 99667  | 8993  | 0.1163 | 499319 | 11.1 | 83.3  |
| 18CA59@-12 | 1474 | 150  | 688  | 62.2 | 0.68 | 20520 | 99317  | 5475  | 0.1013 | 501677 | 18.1 | 100.4 |
| 18CA59@-13 | 1519 | 168  | 827  | 78.4 | 0.46 | 21245 | 116805 | 8365  | 0.1138 | 485625 | 14.0 | 80.1  |
| 18CA59@-14 | 1581 | 169  | 786  | 76.6 | 0.59 | 21686 | 130654 | 8351  | 0.1134 | 476625 | 15.6 | 78.7  |
| 18CA59@-15 | 1553 | 158  | 736  | 67.7 | 0.34 | 21057 | 109393 | 6230  | 0.1079 | 497401 | 17.6 | 91.1  |
| 18CA59@-16 | 1512 | 159  | 747  | 69.2 | 0.28 | 20792 | 121652 | 9407  | 0.1524 | 484780 | 12.9 | 93.2  |
| 18CA59@-17 | 1516 | 155  | 737  | 68.1 | 0.39 | 20850 | 114478 | 7200  | 0.1076 | 493590 | 15.9 | 90.3  |
| 18CA59@-18 | 1509 | 165  | 818  | 80.2 | 0.67 | 20738 | 129784 | 9238  | 0.1149 | 476142 | 14.0 | 80.7  |
| 18CA59@-19 | 1582 | 171  | 843  | 83.0 | 0.63 | 21362 | 126204 | 9369  | 0.1151 | 478555 | 13.5 | 78.3  |
| 18CA59@-20 | 1573 | 165  | 800  | 74.7 | 0.40 | 21606 | 134427 | 7822  | 0.1093 | 472471 | 17.2 | 77.0  |
| 18CA59@-21 | 1563 | 160  | 758  | 71.9 | 0.28 | 21485 | 129705 | 8084  | 0.1121 | 478392 | 16.0 | 83.5  |
| 18CA59@-22 | 1943 | 212  | 1028 | 98.1 | 0.46 | 26067 | 131189 | 11153 | 0.1126 | 461472 | 11.8 | 57.8  |
| 18CA59@-23 | 1582 | 167  | 822  | 76.0 | 0.55 | 21440 | 127336 | 8736  | 0.1146 | 472006 | 14.6 | 78.1  |
| 18CA59@-24 | 1514 | 165  | 847  | 79.3 | 0.37 | 20914 | 122603 | 8836  | 0.1165 | 483393 | 13.9 | 78.4  |
| 18CA59@-25 | 1477 | 162  | 823  | 77.8 | 0.99 | 20256 | 152982 | 10005 | 0.1128 | 458095 | 15.3 | 78.0  |
| 18CA59@-26 | 1568 | 161  | 766  | 71.5 | 0.65 | 21473 | 116877 | 6999  | 0.1062 | 493168 | 16.7 | 85.9  |
| 18CA59@-27 | 1659 | 173  | 841  | 78.3 | 0.77 | 22721 | 125934 | 8367  | 0.1098 | 477105 | 15.1 | 72.9  |
| 18CA59@-28 | 1659 | 178  | 850  | 82.2 | 0.40 | 22781 | 125523 | 8595  | 0.1136 | 481775 | 14.6 | 76.5  |
| 18CA59@-29 | 1578 | 166  | 807  | 74.6 | 0.59 | 22113 | 119024 | 8192  | 0.1155 | 485088 | 14.5 | 79.8  |
| 18CA59@-30 | 1725 | 182  | 899  | 86.7 | 0.71 | 23120 | 104373 | 10779 | 0.1176 | 491117 | 9.7  | 78.3  |
| 18CA66@01  | 1996 | 218  | 1128 | 112  | 0.30 | 29592 | 28108  | 27626 | 0.0007 | 564468 | 1.0  | 64.9  |
| 18CA66@02  | 1948 | 221  | 1210 | 117  | 0.84 | 30661 | 15108  | 5281  | 0.0001 | 604483 | 2.9  | 51.2  |
| 18CA66@03  | 1454 | 149  | 761  | 75.1 | 0.26 | 21360 | 36962  | 7153  | 0.0003 | 585037 | 5.2  | 101.2 |
| 18CA66@04  | 1362 | 133  | 613  | 58.6 | 0.63 | 21381 | 41691  | 11960 | 0.0004 | 580204 | 3.5  | 134.9 |
| 18CA66@05  | 2191 | 244  | 1294 | 131  | 0.56 | 30578 | 14124  | 4687  | 0.0001 | 604643 | 3.0  | 49.3  |
| 18CA66@06  | 1196 | 122  | 562  | 47.3 | 0.74 | 19995 | 47399  | 6656  | 0.0004 | 582774 | 7.1  | 128.5 |
| 18CA66@07  | 431  | 31.1 | 116  | 9.93 | 0.13 | 11140 | 32080  | 5251  | 0.0000 | 607740 | 6.1  | 580.9 |
| 18CA66@08  | 2017 | 206  | 1026 | 90.9 | 0.74 | 31998 | 27484  | 7019  | 0.0000 | 586368 | 3.9  | 56.5  |
| 18CA66@09  | 975  | 83.8 | 370  | 29.6 | 0.24 | 20494 | 23677  | 10552 | 0.0002 | 602433 | 2.2  | 173.4 |
| 18CA66@10  | 525  | 38.1 | 135  | 10.9 | 0.25 | 12934 | 44858  | 5641  | 0.0001 | 595086 | 8.0  | 463.9 |
| 18CA66@11  | 1378 | 132  | 603  | 55.6 | 0.33 | 20607 | 31568  | 3946  | 0.0001 | 598087 | 8.0  | 128.4 |
| 18CA66@12  | 857  | 56.1 | 180  | 12.7 | 0.46 | 24171 | 55947  | 5535  | 0.0001 | 563886 | 10.1 | 314.4 |
| 18CA66@13  | 1382 | 139  | 682  | 64.4 | 0.20 | 20929 | 33063  | 6266  | 0.0002 | 594026 | 5.3  | 115.1 |
| 18CA66@14  | 1583 | 146  | 640  | 58.1 | 0.38 | 25087 | 41914  | 7734  | 0.0003 | 576427 | 5.4  | 105.1 |
| 18CA66@15  | 2151 | 237  | 1236 | 119  | 0.75 | 31241 | 40266  | 11350 | 0.0001 | 574924 | 3.5  | 49.9  |
| 18CA66@16  | 822  | 70.0 | 283  | 20.5 | 0.77 | 19104 | 20992  | 10276 | 0.0001 | 607424 | 2.0  | 225.8 |
| 18CA66@17  | 1615 | 152  | 667  | 55.6 | 0.77 | 27298 | 13789  | 7220  | 0.0001 | 603490 | 1.9  | 90.3  |
| 18CA66@18  | 1325 | 125  | 576  | 51.9 | 0.50 | 21083 | 33378  | 10770 | 0.0005 | 588830 | 3.1  | 138.6 |
| 18CA66@19  | 2579 | 280  | 1382 | 131  | 0.89 | 35867 | 31128  | 7945  | 0.0001 | 582912 | 3.9  | 41.7  |
| 18CA66@20  | 1848 | 192  | 955  | 90.3 | 0.46 | 27165 | 42944  | 9137  | 0.0001 | 583700 | 4.7  | 68.2  |
| 18CA66@21  | 1413 | 133  | 626  | 53.0 | 0.53 | 22409 | 27551  | 5599  | 0.0001 | 602296 | 4.9  | 100.2 |
| 18CA66@22  | 1946 | 201  | 982  | 96.3 | 1.02 | 27447 | 38505  | 8850  | 0.0001 | 581163 | 4.4  | 66.2  |
| 18CA66@23  | 955  | 92.3 | 432  | 38.0 | 0.18 | 17770 | 20293  | 13935 | 0.0001 | 601942 | 1.5  | 148.9 |
| 18CA66@24  | 2194 | 238  | 1194 | 115  | 0.61 | 31410 | 43495  | 11078 | 0.0001 | 570533 | 3.9  | 51.2  |
| 18CA66@25  | 252  | 17.3 | 63.5 | 5.00 | 0.35 | 8265  | 34375  | 5258  | 0.0001 | 608727 | 6.5  | 917.0 |
| 18CA66@26  | 1934 | 208  | 1034 | 98.3 | 0.67 | 30410 | 8598   | 6312  | 0.0001 | 607929 | 1.4  | 61.6  |
| 18CA66@27  | 1657 | 170  | 854  | 81.1 | 0.40 | 24804 | 20132  | 6174  | 0.0001 | 607818 | 3.3  | 78.0  |

|           |      |     |      |      |      |       |        |       |        |        |      |       |
|-----------|------|-----|------|------|------|-------|--------|-------|--------|--------|------|-------|
| 18CA66@28 | 1850 | 186 | 895  | 80.7 | 0.32 | 27351 | 24094  | 4260  | 0.0001 | 595427 | 5.7  | 68.9  |
| 18CA66@29 | 1506 | 160 | 805  | 77.5 | 0.57 | 21377 | 30506  | 6382  | 0.0003 | 600248 | 4.8  | 105.3 |
| 18CA66@30 | 1184 | 112 | 517  | 44.1 | 0.20 | 20251 | 8578   | 4038  | 0.0001 | 626084 | 2.1  | 136.0 |
| 18CA84@01 | 1903 | 244 | 1345 | 130  | 0.58 | 32952 | 47614  | 14179 | 0.0049 | 589335 | 3.4  | 34.3  |
| 18CA84@02 | 2034 | 243 | 1308 | 125  | 0.83 | 34996 | 63018  | 9108  | 0.0060 | 584065 | 6.9  | 35.2  |
| 18CA84@03 | 1354 | 143 | 715  | 62.1 | 0.80 | 22223 | 144420 | 7331  | 0.0127 | 506813 | 19.7 | 71.8  |
| 18CA84@04 | 1602 | 176 | 895  | 82.7 | 0.69 | 27379 | 86557  | 8994  | 0.0067 | 559282 | 9.6  | 49.3  |
| 18CA84@05 | 1148 | 119 | 539  | 48.3 | 0.68 | 18792 | 123106 | 3592  | 0.0194 | 543806 | 34.3 | 136.3 |
| 18CA84@06 | 2818 | 342 | 1821 | 179  | 1.27 | 40227 | 61771  | 14860 | 0.0064 | 556292 | 4.2  | 25.7  |
| 18CA84@07 | 2096 | 272 | 1530 | 154  | 0.85 | 37758 | 46980  | 10751 | 0.0069 | 583339 | 4.4  | 28.8  |
| 18CA84@08 | 1903 | 213 | 1125 | 104  | 0.18 | 32589 | 68642  | 9531  | 0.0069 | 568504 | 7.2  | 41.0  |
| 18CA84@09 | 1801 | 210 | 1129 | 99.3 | 0.60 | 30944 | 68614  | 13442 | 0.0111 | 570038 | 5.1  | 40.7  |
| 18CA84@10 | 1603 | 176 | 930  | 84.2 | 0.52 | 27054 | 73064  | 13615 | 0.0061 | 566185 | 5.4  | 50.3  |
| 18CA84@11 | 1774 | 206 | 948  | 86.1 | 0.75 | 28186 | 81620  | 14498 | 0.0060 | 550845 | 5.6  | 54.8  |
| 18CA84@12 | 1162 | 136 | 716  | 61.2 | 0.31 | 23198 | 84706  | 8395  | 0.0055 | 561844 | 10.1 | 65.3  |
| 18CA84@13 | 1420 | 147 | 726  | 64.8 | 0.50 | 22333 | 187320 | 7529  | 0.0162 | 458798 | 24.9 | 76.6  |
| 18CA84@14 | 1267 | 126 | 633  | 53.6 | 0.77 | 19350 | 157795 | 5344  | 0.0153 | 493136 | 29.5 | 95.5  |
| 18CA84@15 | 1276 | 128 | 621  | 53.4 | 0.15 | 20780 | 182144 | 8409  | 0.0216 | 467618 | 21.7 | 97.2  |
| 18CA84@16 | 1343 | 149 | 735  | 67.9 | 0.50 | 22907 | 95181  | 11193 | 0.0062 | 543988 | 8.5  | 64.6  |
| 18CA84@17 | 1274 | 132 | 657  | 56.3 | 0.59 | 21922 | 94822  | 5534  | 0.0067 | 551952 | 17.1 | 72.4  |
| 18CA84@18 | 2320 | 274 | 1538 | 147  | 0.60 | 36130 | 75074  | 13579 | 0.0059 | 545241 | 5.5  | 27.1  |
| 18CA84@19 | 1663 | 197 | 991  | 90.7 | 0.79 | 28738 | 76977  | 9407  | 0.0058 | 551307 | 8.2  | 45.4  |
| 18CA84@20 | 1270 | 129 | 616  | 52.2 | 0.95 | 20831 | 178993 | 7159  | 0.0136 | 460880 | 25.0 | 78.3  |
| 18CA84@21 | 1363 | 139 | 658  | 57.6 | 0.74 | 22409 | 173268 | 7100  | 0.0153 | 466693 | 24.4 | 81.2  |
| 18CA84@22 | 1349 | 161 | 805  | 71.1 | 0.49 | 25270 | 57345  | 9065  | 0.0083 | 576167 | 6.3  | 54.2  |
| 18CA84@23 | 1546 | 167 | 770  | 76.2 | 0.71 | 24871 | 94180  | 13098 | 0.0067 | 539483 | 7.2  | 60.9  |
| 18CA84@24 | 1328 | 146 | 779  | 66.8 | 0.87 | 24280 | 65632  | 9337  | 0.0079 | 560691 | 7.0  | 63.8  |

TABLE S6. MAJOR AND TRACE ELEMENT COMPOSITIONS AND CALCULATED PARAMETERS OF THE GRANITE DYKES FROM THE SOUTHERN CHINESE ALTAI

| Data Sources                       |       | Gong et al.(2007)  |         |         |       |         |       |       |       |
|------------------------------------|-------|--------------------|---------|---------|-------|---------|-------|-------|-------|
| Lithology                          |       | Granite porphyries |         |         |       |         |       |       |       |
| Sample No.                         | A8236 | A8246              | A8246-1 | A8246-2 | A8262 | A8262-2 | A9013 | A9022 | A9024 |
| <u>Major elements (wt.%)</u>       |       |                    |         |         |       |         |       |       |       |
| SiO <sub>2</sub>                   | 75.38 | 72.67              | 71.48   | 72.65   | 70.90 | 70.98   | 72.71 | 74.08 | 75.27 |
| TiO <sub>2</sub>                   | 0.10  | 0.23               | 0.22    | 0.18    | 0.29  | 0.29    | 0.21  | 0.12  | 0.08  |
| Al <sub>2</sub> O <sub>3</sub>     | 13.13 | 14.37              | 13.64   | 13.51   | 14.53 | 14.38   | 13.85 | 13.35 | 12.80 |
| Fe <sub>2</sub> O <sub>3</sub> T   | 1.37  | 2.21               | 2.19    | 1.77    | 2.62  | 2.65    | 1.92  | 1.43  | 1.15  |
| MnO                                | 0.04  | 0.05               | 0.04    | 0.03    | 0.05  | 0.05    | 0.05  | 0.05  | 0.03  |
| MgO                                | 0.27  | 0.57               | 0.54    | 0.50    | 0.79  | 0.74    | 0.54  | 0.43  | 0.13  |
| CaO                                | 0.68  | 1.29               | 1.79    | 1.36    | 1.76  | 1.96    | 0.82  | 0.50  | 0.33  |
| Na <sub>2</sub> O                  | 3.51  | 3.72               | 3.73    | 3.63    | 3.67  | 3.62    | 3.94  | 3.14  | 4.11  |
| K <sub>2</sub> O                   | 4.85  | 3.98               | 4.31    | 3.92    | 4.08  | 3.98    | 4.53  | 5.42  | 4.88  |
| P <sub>2</sub> O <sub>5</sub>      | 0.04  | 0.09               | 0.08    | 0.06    | 0.11  | 0.10    | 0.07  | 0.04  | 0.04  |
| LOI                                | 0.47  | 0.67               | 1.41    | 1.56    | 0.88  | 0.61    | 0.85  | 0.90  | 0.53  |
| Total                              | 99.84 | 99.85              | 99.43   | 99.17   | 99.68 | 99.36   | 99.49 | 99.46 | 99.35 |
| Mg#                                | 28    | 34                 | 33      | 36      | 37    | 36      | 36    | 37    | 18    |
| ACNK                               | 1.07  | 1.13               | 0.97    | 1.07    | 1.06  | 1.04    | 1.08  | 1.12  | 1.01  |
| ANK                                | 1.19  | 1.38               | 1.26    | 1.32    | 1.39  | 1.40    | 1.22  | 1.21  | 1.06  |
| K <sub>2</sub> O/Na <sub>2</sub> O | 1.38  | 1.07               | 1.16    | 1.08    | 1.11  | 1.10    | 1.15  | 1.73  | 1.19  |
| <u>Trace elements (ppm)</u>        |       |                    |         |         |       |         |       |       |       |
| Ga                                 | 14.9  | 15.3               | 14.9    | 14.6    | 18.2  | 18.9    | 15.7  | 14.8  | 12.5  |
| Rb                                 | 143   | 80                 | 101     | 102     | 79.8  | 77.2    | 125   | 167   | 133   |
| Sr                                 | 111   | 263                | 209     | 199     | 287   | 302     | 270   | 206   | 107   |
| Y                                  | 16.4  | 16.3               | 16.4    | 11.3    | 19.8  | 19.1    | 13.4  | 14.8  | 11.4  |
| Zr                                 | 73.8  | 149                | 155     | 109     | 189   | 193     | 123   | 102   | 70.2  |
| Nb                                 | 9.48  | 7.97               | 6.37    | 6.85    | 13.7  | 11.3    | 8.43  | 13.9  | 9.92  |
| Cs                                 | 2.3   | 1.17               | 1.36    | 1.95    | 0.73  | 1.11    | 1.26  | 1.84  | 1.08  |
| Ba                                 | 337   | 594                | 628     | 637     | 724   | 702     | 759   | 670   | 672   |
| La                                 | 19    | 25.5               | 24.1    | 21.5    | 28.3  | 27.6    | 23.7  | 24.3  | 17.2  |
| Ce                                 | 32.8  | 51.6               | 49.1    | 38.4    | 58.3  | 57.5    | 47.1  | 48.8  | 28.9  |
| Pr                                 | 4     | 5.44               | 5.13    | 4.01    | 6.4   | 6.27    | 4.53  | 4.39  | 3.33  |
| Nd                                 | 14.9  | 20.1               | 19      | 14      | 24.5  | 23.6    | 16    | 15.2  | 11.7  |
| Sm                                 | 3.05  | 3.6                | 3.52    | 2.42    | 4.53  | 4.41    | 2.85  | 2.74  | 2.12  |
| Eu                                 | 0.52  | 0.95               | 0.94    | 0.78    | 1.1   | 1.07    | 0.85  | 0.73  | 0.57  |
| Gd                                 | 3.14  | 3.79               | 3.63    | 2.6     | 4.7   | 4.4     | 3.04  | 3.06  | 2.24  |
| Tb                                 | 0.45  | 0.48               | 0.47    | 0.33    | 0.59  | 0.57    | 0.39  | 0.4   | 0.3   |
| Dy                                 | 2.67  | 2.79               | 2.72    | 1.85    | 3.41  | 3.31    | 2.19  | 2.34  | 1.8   |
| Ho                                 | 0.54  | 0.55               | 0.55    | 0.37    | 0.67  | 0.65    | 0.44  | 0.49  | 0.37  |
| Er                                 | 1.73  | 1.73               | 1.77    | 1.19    | 2.11  | 2.03    | 1.45  | 1.58  | 1.21  |
| Tm                                 | 0.25  | 0.26               | 0.26    | 0.18    | 0.3   | 0.3     | 0.21  | 0.25  | 0.19  |
| Yb                                 | 1.77  | 1.8                | 1.85    | 1.31    | 2.16  | 2.1     | 1.57  | 1.74  | 1.37  |
| Lu                                 | 0.27  | 0.28               | 0.29    | 0.22    | 0.33  | 0.32    | 0.25  | 0.28  | 0.21  |
| Hf                                 | 2.74  | 4.22               | 4.4     | 3.27    | 5.08  | 5.14    | 3.64  | 3.29  | 2.4   |
| Ta                                 | 0.53  | 0.4                | 0.39    | 0.53    | 0.45  | 0.41    | 0.57  | 0.74  | 0.54  |
| Pb                                 | 17.2  | 13.1               | 12.7    | 15.6    | 15    | 17.2    | 18.5  | 14.7  | 14.6  |

|                      |       |        |        |       |        |        |       |       |       |
|----------------------|-------|--------|--------|-------|--------|--------|-------|-------|-------|
| Th                   | 12.7  | 6.41   | 6.81   | 9.89  | 7.29   | 7.2    | 10.9  | 11.8  | 11.7  |
| U                    | 1.95  | 1.55   | 1.56   | 2.58  | 1.47   | 1.63   | 2.21  | 1.91  | 3.49  |
| ΣLREE                | 74.27 | 107.19 | 101.79 | 81.11 | 123.13 | 120.45 | 95.03 | 96.16 | 63.82 |
| ΣHREE                | 10.82 | 11.68  | 11.54  | 8.05  | 14.27  | 13.68  | 9.54  | 10.14 | 7.69  |
| Rb/Sr                | 1.29  | 0.30   | 0.48   | 0.51  | 0.28   | 0.26   | 0.46  | 0.81  | 1.24  |
| Rb/Ba                | 0.42  | 0.13   | 0.16   | 0.16  | 0.11   | 0.11   | 0.16  | 0.25  | 0.20  |
| Nb/Ta                | 17.89 | 19.93  | 16.33  | 12.92 | 30.44  | 27.56  | 14.79 | 18.78 | 18.37 |
| Zr/Hf                | 26.93 | 35.31  | 35.23  | 33.33 | 37.20  | 37.55  | 33.79 | 31.00 | 29.25 |
| Y/Ho                 | 30.37 | 29.64  | 29.82  | 30.54 | 29.55  | 29.38  | 30.45 | 30.20 | 30.81 |
| 10000*Ga/Al          | 2.14  | 2.01   | 2.06   | 2.04  | 2.37   | 2.48   | 2.14  | 2.09  | 1.84  |
| δEu                  | 0.51  | 0.79   | 0.80   | 0.95  | 0.73   | 0.74   | 0.88  | 0.77  | 0.80  |
| TE <sub>1,3</sub>    | 0.94  | 0.95   | 0.95   | 0.93  | 0.95   | 0.96   | 0.96  | 0.96  | 0.92  |
| T <sub>Zr</sub> (°C) | 728   | 787    | 775    | 757   | 801    | 800    | 767   | 757   | 719   |

TABLE A2 (CONTINUED)

| Data Sources                       |       | Zhang et al.(2012) |       |       |       |       |       |       |       |       |
|------------------------------------|-------|--------------------|-------|-------|-------|-------|-------|-------|-------|-------|
| Lithology                          |       | Granite porphyries |       |       |       |       |       |       |       |       |
| Sample No.                         | 08AL  | 08AL               | 08AL  | 08AL  | 08AL  | 08AL  | 08AL  | 08AL  | 08AL  | 08AL  |
|                                    | 18-1  | 18-4               | 18-5  | 18-6  | 18-7  | 18-8  | 18-12 | 18-13 | 18-14 | 18-15 |
| <u>Major elements (wt.%)</u>       |       |                    |       |       |       |       |       |       |       |       |
| SiO <sub>2</sub>                   | 72.83 | 73.38              | 73.11 | 73.39 | 72.85 | 72.91 | 71.24 | 71.73 | 73.54 | 72.62 |
| TiO <sub>2</sub>                   | 0.21  | 0.19               | 0.21  | 0.21  | 0.21  | 0.22  | 0.23  | 0.23  | 0.18  | 0.23  |
| Al <sub>2</sub> O <sub>3</sub>     | 14.20 | 13.91              | 13.95 | 13.76 | 14.24 | 14.15 | 14.21 | 14.13 | 13.77 | 14.11 |
| Fe <sub>2</sub> O <sub>3</sub> T   | 1.71  | 1.63               | 1.81  | 1.70  | 1.72  | 1.76  | 1.86  | 1.91  | 1.58  | 1.86  |
| MnO                                | 0.04  | 0.04               | 0.05  | 0.04  | 0.03  | 0.03  | 0.03  | 0.04  | 0.04  | 0.03  |
| MgO                                | 0.51  | 0.46               | 0.48  | 0.46  | 0.48  | 0.50  | 0.53  | 0.53  | 0.43  | 0.55  |
| CaO                                | 1.76  | 1.42               | 1.70  | 1.61  | 1.83  | 1.82  | 1.98  | 1.92  | 1.42  | 1.80  |
| Na <sub>2</sub> O                  | 3.49  | 3.46               | 3.46  | 3.45  | 3.53  | 3.47  | 3.45  | 3.45  | 3.44  | 3.54  |
| K <sub>2</sub> O                   | 4.05  | 4.32               | 3.91  | 3.98  | 3.83  | 3.89  | 3.65  | 3.74  | 4.43  | 4.04  |
| P <sub>2</sub> O <sub>5</sub>      | 0.09  | 0.08               | 0.10  | 0.09  | 0.09  | 0.09  | 0.09  | 0.10  | 0.08  | 0.09  |
| LOI                                | 0.50  | 0.49               | 0.63  | 0.71  | 0.58  | 0.55  | 2.18  | 1.65  | 0.47  | 0.52  |
| Total                              | 99.39 | 99.38              | 99.41 | 99.40 | 99.39 | 99.39 | 99.45 | 99.43 | 99.38 | 99.39 |
| Mg#                                | 37    | 36                 | 34    | 35    | 36    | 36    | 36    | 35    | 35    | 37    |
| ACNK                               | 1.07  | 1.07               | 1.07  | 1.07  | 1.07  | 1.07  | 1.07  | 1.07  | 1.06  | 1.05  |
| ANK                                | 1.40  | 1.34               | 1.41  | 1.38  | 1.43  | 1.43  | 1.48  | 1.45  | 1.32  | 1.38  |
| K <sub>2</sub> O/Na <sub>2</sub> O | 1.16  | 1.25               | 1.13  | 1.15  | 1.08  | 1.12  | 1.06  | 1.08  | 1.29  | 1.14  |
| <u>Trace elements (ppm)</u>        |       |                    |       |       |       |       |       |       |       |       |
| Ga                                 | 14.8  | 14.9               | 15.4  | 15.3  | 15.4  | 15.7  | 13.5  | 9.03  | 15.3  | 15.3  |
| Rb                                 | 73.7  | 87.5               | 68.4  | 73.1  | 73.5  | 73.1  | 86.9  | 52.5  | 88.2  | 78.9  |
| Sr                                 | 237   | 230                | 247   | 233   | 264   | 266   | 283   | 99    | 232   | 266   |
| Y                                  | 15.45 | 16.05              | 17.23 | 16.84 | 18.43 | 16.23 | 15.17 | 12.16 | 16.29 | 15.58 |
| Zr                                 | 148   | 152                | 156   | 182   | 185   | 172   | 151   | 144   | 149   | 170   |
| Nb                                 | 3.96  | 4.7                | 3.83  | 4.31  | 4.75  | 4.12  | 4.49  | 4.03  | 4.62  | 4.67  |
| Cs                                 |       |                    |       |       |       |       |       |       |       |       |
| Ba                                 | 682   | 872                | 772   | 718   | 682   | 793   | 887   | 734   | 865   | 768   |
| La                                 | 25    | 28.36              | 27.43 | 26.6  | 32.16 | 24.88 | 31.32 | 20.18 | 28.8  | 27.07 |
| Ce                                 | 48.55 | 54.31              | 53.1  | 51.67 | 62.11 | 48.41 | 61.28 | 40.08 | 57.47 | 51.66 |
| Pr                                 | 5.52  | 6.04               | 6.04  | 5.95  | 7.1   | 5.56  | 6.65  | 4.6   | 6.27  | 5.91  |

|                      |        |        |        |        |       |        |        |       |        |        |
|----------------------|--------|--------|--------|--------|-------|--------|--------|-------|--------|--------|
| Nd                   | 19.77  | 22.07  | 21.73  | 21.23  | 25.21 | 19.88  | 23.3   | 16.42 | 22.4   | 21.03  |
| Sm                   | 3.27   | 3.7    | 3.66   | 3.61   | 4.24  | 3.39   | 3.67   | 2.82  | 3.64   | 3.52   |
| Eu                   | 0.61   | 0.69   | 0.77   | 0.67   | 0.68  | 0.72   | 0.65   | 0.56  | 0.65   | 0.7    |
| Gd                   | 2.99   | 3.26   | 3.2    | 3.16   | 3.74  | 3.08   | 3.14   | 2.64  | 3.32   | 3.12   |
| Tb                   | 0.46   | 0.5    | 0.51   | 0.51   | 0.56  | 0.47   | 0.45   | 0.39  | 0.51   | 0.48   |
| Dy                   | 2.65   | 2.79   | 2.96   | 2.89   | 3.24  | 2.81   | 2.61   | 2.25  | 2.82   | 2.7    |
| Ho                   | 0.54   | 0.57   | 0.61   | 0.6    | 0.66  | 0.57   | 0.53   | 0.44  | 0.58   | 0.56   |
| Er                   | 1.53   | 1.65   | 1.78   | 1.77   | 1.91  | 1.67   | 1.59   | 1.33  | 1.71   | 1.63   |
| Tm                   | 0.23   | 0.25   | 0.26   | 0.28   | 0.29  | 0.26   | 0.25   | 0.22  | 0.26   | 0.25   |
| Yb                   | 1.72   | 1.79   | 1.82   | 1.95   | 1.99  | 1.82   | 1.75   | 1.43  | 1.8    | 1.76   |
| Lu                   | 0.27   | 0.28   | 0.29   | 0.31   | 0.33  | 0.29   | 0.28   | 0.24  | 0.29   | 0.28   |
| Hf                   | 4.23   | 4.47   | 4.59   | 5.04   | 5.16  | 4.83   | 4.42   | 4.04  | 4.45   | 4.81   |
| Ta                   | 0.43   | 0.56   | 0.42   | 0.5    | 0.51  | 0.45   | 0.5    | 0.45  | 0.53   | 0.49   |
| Pb                   |        |        |        |        |       |        |        |       |        |        |
| Th                   | 8.39   | 10.11  | 6.93   | 8.08   | 9.46  | 7.42   | 10.07  | 8.54  | 10.32  | 9.28   |
| U                    | 1.96   | 2.06   | 1.59   | 2.06   | 2.16  | 1.75   | 2.06   | 1.28  | 2.08   | 2.12   |
| ΣLREE                | 102.72 | 115.17 | 112.73 | 109.73 | 131.5 | 102.84 | 126.87 | 84.66 | 119.23 | 109.89 |
| ΣHREE                | 10.39  | 11.09  | 11.43  | 11.47  | 12.72 | 10.97  | 10.6   | 8.94  | 11.29  | 10.78  |
| Rb/Sr                | 0.31   | 0.38   | 0.28   | 0.31   | 0.28  | 0.27   | 0.31   | 0.53  | 0.38   | 0.30   |
| Rb/Ba                | 0.11   | 0.10   | 0.09   | 0.10   | 0.11  | 0.09   | 0.10   | 0.07  | 0.10   | 0.10   |
| Nb/Ta                | 9.21   | 8.39   | 9.12   | 8.62   | 9.31  | 9.16   | 8.98   | 8.96  | 8.72   | 9.53   |
| Zr/Hf                | 34.99  | 34.00  | 33.99  | 36.11  | 35.85 | 35.61  | 34.16  | 35.64 | 33.48  | 35.34  |
| Y/Ho                 | 28.61  | 28.16  | 28.25  | 28.07  | 27.92 | 28.47  | 28.62  | 27.64 | 28.09  | 27.82  |
| 10000*Ga/Al          | 1.97   | 2.02   | 2.09   | 2.10   | 2.04  | 2.10   | 1.79   | 1.21  | 2.10   | 2.05   |
| δEu                  | 0.60   | 0.61   | 0.69   | 0.61   | 0.52  | 0.68   | 0.59   | 0.63  | 0.57   | 0.65   |
| TE <sub>1,3</sub>    | 0.99   | 0.98   | 0.99   | 1.00   | 0.98  | 0.99   | 0.98   | 0.99  | 0.99   | 0.98   |
| T <sub>Zr</sub> (°C) | 782    | 786    | 788    | 801    | 803   | 796    | 784    | 780   | 783    | 792    |

TABLE A2 (CONTINUED)

| Data Sources                     | This study         |        |        |        |        |        |        |        |
|----------------------------------|--------------------|--------|--------|--------|--------|--------|--------|--------|
| Lithology                        | Granite porphyries |        |        |        |        |        |        |        |
| Sample No.                       | 18CA11             | 18CA12 | 18CA87 | 18CA88 | 18CA89 | 18CA90 | 18CA91 | 18CA92 |
| <u>Major elements (wt.%)</u>     |                    |        |        |        |        |        |        |        |
| SiO <sub>2</sub>                 | 72.72              | 72.54  | 76.06  | 72.16  | 72.73  | 73.27  | 74.57  | 73.50  |
| TiO <sub>2</sub>                 | 0.19               | 0.19   | 0.06   | 0.23   | 0.21   | 0.19   | 0.13   | 0.13   |
| Al <sub>2</sub> O <sub>3</sub>   | 14.02              | 14.17  | 12.82  | 14.11  | 13.95  | 13.85  | 13.07  | 13.66  |
| Fe <sub>2</sub> O <sub>3</sub> T | 2.01               | 2.00   | 0.88   | 2.12   | 2.02   | 1.65   | 1.50   | 1.23   |
| MnO                              | 0.05               | 0.03   | 0.02   | 0.04   | 0.03   | 0.04   | 0.04   | 0.03   |
| MgO                              | 0.53               | 0.56   | 0.10   | 0.53   | 0.52   | 0.44   | 0.37   | 0.29   |
| CaO                              | 1.77               | 0.89   | 0.84   | 1.88   | 1.97   | 1.06   | 0.97   | 0.92   |
| Na <sub>2</sub> O                | 3.68               | 4.15   | 3.48   | 3.65   | 3.60   | 4.00   | 3.56   | 3.53   |
| K <sub>2</sub> O                 | 3.81               | 4.35   | 4.80   | 3.76   | 3.76   | 4.36   | 4.52   | 5.43   |
| P <sub>2</sub> O <sub>5</sub>    | 0.07               | 0.08   | 0.02   | 0.08   | 0.07   | 0.06   | 0.05   | 0.04   |
| LOI                              | 1.07               | 0.93   | 0.44   | 0.58   | 0.57   | 0.69   | 0.69   | 1.15   |
| Total                            | 99.92              | 99.89  | 99.52  | 99.14  | 99.43  | 99.61  | 99.47  | 99.91  |
| Mg#                              | 34                 | 36     | 18     | 33     | 34     | 35     | 33     | 32     |
| ACNK                             | 1.05               | 1.08   | 1.03   | 1.05   | 1.03   | 1.05   | 1.04   | 1.02   |
| ANK                              | 1.38               | 1.23   | 1.17   | 1.40   | 1.40   | 1.23   | 1.22   | 1.17   |

|                                    |        |        |        |         |        |        |        |        |
|------------------------------------|--------|--------|--------|---------|--------|--------|--------|--------|
| K <sub>2</sub> O/Na <sub>2</sub> O | 1.04   | 1.05   | 1.38   | 1.03    | 1.04   | 1.09   | 1.27   | 1.54   |
| <u>Trace elements (ppm)</u>        |        |        |        |         |        |        |        |        |
| Ga                                 | 14.83  | 14.09  | 13.43  | 15.68   | 15.53  | 14.64  | 13.35  | 12.17  |
| Rb                                 | 96.3   | 112    | 128.9  | 66.59   | 74.11  | 117.4  | 92.12  | 145.7  |
| Sr                                 | 255.4  | 166.5  | 78.1   | 247.9   | 244.1  | 290.3  | 134.3  | 159.2  |
| Y                                  | 13.87  | 15.69  | 20.08  | 20.96   | 17.24  | 13.62  | 13.71  | 15.84  |
| Zr                                 | 131.1  | 127.5  | 69.63  | 171.1   | 143.9  | 125.7  | 108.3  | 114    |
| Nb                                 | 4.609  | 5.101  | 7.141  | 5.521   | 5.045  | 5.861  | 5.266  | 7.778  |
| Cs                                 | 1.961  | 1.57   | 1.157  | 1.447   | 0.828  | 1.416  | 0.896  | 0.708  |
| Ba                                 | 742    | 711.6  | 374.9  | 628     | 721.7  | 740.6  | 655.5  | 682.9  |
| La                                 | 19.89  | 21.32  | 18.19  | 25.9    | 22.06  | 22.98  | 16.52  | 24.32  |
| Ce                                 | 37.31  | 38.02  | 36.27  | 55.07   | 42.76  | 42.09  | 33.43  | 43.79  |
| Pr                                 | 4.009  | 4.381  | 4.14   | 6.165   | 4.956  | 4.565  | 3.464  | 4.763  |
| Nd                                 | 14.77  | 16.01  | 14.67  | 22.58   | 18.03  | 15.68  | 12.39  | 16.15  |
| Sm                                 | 2.57   | 2.852  | 3.073  | 4.046   | 3.178  | 2.632  | 2.298  | 2.771  |
| Eu                                 | 0.556  | 0.542  | 0.321  | 0.682   | 0.621  | 0.526  | 0.392  | 0.454  |
| Gd                                 | 2.36   | 2.598  | 2.876  | 3.6     | 2.833  | 2.296  | 2.132  | 2.504  |
| Tb                                 | 0.352  | 0.393  | 0.489  | 0.55    | 0.44   | 0.341  | 0.346  | 0.386  |
| Dy                                 | 2.122  | 2.291  | 2.963  | 3.279   | 2.622  | 2.026  | 2.151  | 2.367  |
| Ho                                 | 0.45   | 0.497  | 0.627  | 0.689   | 0.561  | 0.425  | 0.459  | 0.503  |
| Er                                 | 1.298  | 1.418  | 1.744  | 1.94    | 1.605  | 1.225  | 1.338  | 1.484  |
| Tm                                 | 0.205  | 0.219  | 0.269  | 0.303   | 0.245  | 0.197  | 0.221  | 0.24   |
| Yb                                 | 1.464  | 1.564  | 1.863  | 2.08    | 1.771  | 1.38   | 1.548  | 1.743  |
| Lu                                 | 0.241  | 0.254  | 0.29   | 0.325   | 0.283  | 0.235  | 0.249  | 0.288  |
| Hf                                 | 3.824  | 3.892  | 3.035  | 5.012   | 4.292  | 3.832  | 3.61   | 3.669  |
| Ta                                 | 0.472  | 0.496  | 0.728  | 0.448   | 0.419  | 0.606  | 0.563  | 0.859  |
| Pb                                 | 14.3   | 12.15  | 18.52  | 12.23   | 11.99  | 17.65  | 16.94  | 13.6   |
| Th                                 | 9.777  | 11.37  | 14.02  | 7.346   | 6.175  | 11.4   | 11     | 12.88  |
| U                                  | 2.2    | 2.41   | 2.281  | 1.53    | 1.233  | 3.345  | 1.508  | 2.357  |
| ΣLREE                              | 79.105 | 83.125 | 76.664 | 114.443 | 91.605 | 88.473 | 68.494 | 92.248 |
| ΣHREE                              | 8.492  | 9.234  | 11.121 | 12.766  | 10.36  | 8.125  | 8.444  | 9.515  |
| Rb/Sr                              | 0.38   | 0.67   | 1.65   | 0.27    | 0.30   | 0.40   | 0.69   | 0.92   |
| Rb/Ba                              | 0.13   | 0.16   | 0.34   | 0.11    | 0.10   | 0.16   | 0.14   | 0.21   |
| Nb/Ta                              | 9.76   | 10.28  | 9.81   | 12.32   | 12.04  | 9.67   | 9.35   | 9.05   |
| Zr/Hf                              | 34.28  | 32.76  | 22.94  | 34.14   | 33.53  | 32.80  | 30.00  | 31.07  |
| Y/Ho                               | 30.82  | 31.57  | 32.03  | 30.42   | 30.73  | 32.05  | 29.87  | 31.49  |
| 10000*Ga/Al                        | 2.00   | 1.88   | 1.98   | 2.10    | 2.10   | 2.00   | 1.93   | 1.68   |
| δEu                                | 0.69   | 0.61   | 0.33   | 0.55    | 0.63   | 0.65   | 0.54   | 0.53   |
| TE <sub>1,3</sub>                  | 0.96   | 0.94   | 1.01   | 1.00    | 0.97   | 0.97   | 1.00   | 0.97   |
| T <sub>Zr</sub> (°C)               | 770    | 769    | 722    | 792     | 776    | 767    | 756    | 757    |

TABLE A2 (CONTINUED)

| Data Sources                       |                   | this study |        |        |        |        |        |          |          |        |
|------------------------------------|-------------------|------------|--------|--------|--------|--------|--------|----------|----------|--------|
| Lithology                          | Two-mica granites |            |        |        |        |        |        |          |          |        |
| Sample No.                         | 18CA57            | 18CA59     | 18CA67 | 18CA73 | 18CA76 | 18CA80 | 18CA82 | 18CA83-1 | 18CA83-2 | 18CA85 |
| <u>Major elements (wt.%)</u>       |                   |            |        |        |        |        |        |          |          |        |
| SiO <sub>2</sub>                   | 76.63             | 74.16      | 75.09  | 76.71  | 74.73  | 74.25  | 76.35  | 76.14    | 74.07    | 74.35  |
| TiO <sub>2</sub>                   | 0.08              | 0.07       | 0.03   | 0.04   | 0.05   | 0.04   | 0.05   | 0.04     | 0.04     | 0.04   |
| Al <sub>2</sub> O <sub>3</sub>     | 14.32             | 14.89      | 14.94  | 12.60  | 14.08  | 14.15  | 13.19  | 13.31    | 14.52    | 14.21  |
| Fe <sub>2</sub> O <sub>3</sub> T   | 0.94              | 0.92       | 0.61   | 0.75   | 0.55   | 0.47   | 0.52   | 0.54     | 0.75     | 0.64   |
| MnO                                | 0.01              | 0.03       | 0.03   | 0.01   | 0.02   | 0.01   | 0.01   | 0.01     | 0.04     | 0.03   |
| MgO                                | 0.23              | 0.22       | 0.14   | 0.04   | 0.07   | 0.06   | 0.06   | 0.07     | 0.15     | 0.12   |
| CaO                                | 0.74              | 1.89       | 1.23   | 0.66   | 0.63   | 0.76   | 0.71   | 0.51     | 0.48     | 0.50   |
| Na <sub>2</sub> O                  | 1.85              | 6.40       | 5.65   | 2.46   | 4.18   | 4.65   | 3.54   | 3.99     | 3.95     | 4.78   |
| K <sub>2</sub> O                   | 3.23              | 0.57       | 1.54   | 6.56   | 5.51   | 4.57   | 4.91   | 4.99     | 4.60     | 4.01   |
| P <sub>2</sub> O <sub>5</sub>      | 0.16              | 0.05       | 0.06   | 0.05   | 0.12   | 0.04   | 0.06   | 0.04     | 0.25     | 0.26   |
| LOI                                | 1.38              | 0.24       | 0.48   | 0.09   | 0.23   | 0.21   | 0.39   | 0.23     | 0.66     | 0.36   |
| Total                              | 99.57             | 99.44      | 99.80  | 99.97  | 100.17 | 99.21  | 99.79  | 99.87    | 99.51    | 99.30  |
| Mg#                                | 33                | 32         | 31     | 10     | 20     | 20     | 19     | 20       | 28       | 27     |
| ACNK                               | 1.82              | 1.02       | 1.13   | 1.02   | 1.01   | 1.01   | 1.06   | 1.03     | 1.18     | 1.08   |
| ANK                                | 2.19              | 1.34       | 1.36   | 1.13   | 1.10   | 1.12   | 1.18   | 1.11     | 1.27     | 1.16   |
| K <sub>2</sub> O/Na <sub>2</sub> O | 1.75              | 0.09       | 0.27   | 2.67   | 1.32   | 0.98   | 1.39   | 1.25     | 1.16     | 0.84   |
| <u>Trace elements (ppm)</u>        |                   |            |        |        |        |        |        |          |          |        |
| Ga                                 | 15.03             | 15.88      | 14.43  | 14.45  | 17.81  | 20.36  | 13.78  | 13.69    | 15.99    | 14.86  |
| Rb                                 | 155.5             | 25.07      | 40.34  | 170.5  | 250.9  | 203.2  | 246.1  | 161.6    | 212.9    | 231.9  |
| Sr                                 | 40.57             | 77.32      | 28.08  | 55.26  | 20.9   | 9.538  | 60.15  | 20.81    | 27.25    | 14.67  |
| Y                                  | 25.84             | 40.95      | 27.73  | 59.72  | 16.73  | 41.71  | 35.84  | 11.01    | 8.769    | 6.988  |
| Zr                                 | 67.92             | 28.9       | 41.54  | 74     | 24.84  | 28.72  | 57.06  | 46       | 22.47    | 31.7   |
| Nb                                 | 12.82             | 8.833      | 8.335  | 13.59  | 13.02  | 23.7   | 7.935  | 12.11    | 15.51    | 9.384  |
| Cs                                 | 4.03              | 1.794      | 1.058  | 1.703  | 4.128  | 4.753  | 4.318  | 6.153    | 6.844    | 11.38  |
| Ba                                 | 133               | 32.04      | 14.34  | 316.3  | 56.05  | 20.17  | 189    | 22.72    | 63.78    | 51.27  |
| La                                 | 11.42             | 11.33      | 11.16  | 10.1   | 3.817  | 9.874  | 7.652  | 4.311    | 2.661    | 3.437  |
| Ce                                 | 25.15             | 24.83      | 23.6   | 24.59  | 8.729  | 24     | 14.84  | 7.441    | 5.744    | 7.04   |
| Pr                                 | 3.258             | 3.239      | 3.006  | 3.581  | 1.145  | 3.244  | 1.883  | 0.842    | 0.678    | 0.91   |
| Nd                                 | 12.62             | 12.94      | 10.78  | 15.33  | 4.218  | 12.18  | 6.977  | 2.851    | 2.518    | 3.293  |
| Sm                                 | 3.414             | 4.013      | 3.266  | 4.807  | 1.351  | 4.447  | 2.057  | 0.788    | 0.707    | 0.881  |
| Eu                                 | 0.35              | 0.607      | 0.256  | 0.649  | 0.172  | 0.152  | 0.395  | 0.141    | 0.155    | 0.107  |
| Gd                                 | 3.237             | 4.397      | 3.04   | 5.587  | 1.553  | 4.32   | 2.617  | 0.861    | 0.761    | 0.88   |
| Tb                                 | 0.668             | 0.988      | 0.664  | 1.236  | 0.359  | 0.981  | 0.639  | 0.198    | 0.171    | 0.182  |
| Dy                                 | 4.111             | 6.426      | 4.133  | 8.786  | 2.449  | 6.118  | 4.671  | 1.458    | 1.149    | 1.143  |
| Ho                                 | 0.825             | 1.28       | 0.849  | 1.984  | 0.518  | 1.228  | 1.117  | 0.349    | 0.242    | 0.217  |
| Er                                 | 2.335             | 3.785      | 2.551  | 5.71   | 1.519  | 3.576  | 3.456  | 1.126    | 0.7      | 0.6    |
| Tm                                 | 0.392             | 0.707      | 0.519  | 0.89   | 0.257  | 0.636  | 0.586  | 0.221    | 0.119    | 0.099  |
| Yb                                 | 2.888             | 5.32       | 4.43   | 6.055  | 1.906  | 4.682  | 4.196  | 1.706    | 0.878    | 0.714  |
| Lu                                 | 0.446             | 0.853      | 0.712  | 0.904  | 0.294  | 0.727  | 0.653  | 0.314    | 0.133    | 0.108  |
| Hf                                 | 2.666             | 1.378      | 2.262  | 5.118  | 1.449  | 2.447  | 2.653  | 2.611    | 1.099    | 1.679  |
| Ta                                 | 1.335             | 1.954      | 1.429  | 1.933  | 1.06   | 3.218  | 1.224  | 1.579    | 3.032    | 2.475  |
| Pb                                 | 22.52             | 17.77      | 31.7   | 25.22  | 23.66  | 33.78  | 36.98  | 33.31    | 23.41    | 24.22  |
| Th                                 | 12.49             | 9.643      | 8.433  | 23.39  | 4.509  | 10.5   | 11.48  | 18.8     | 1.472    | 2.045  |
| U                                  | 4.23              | 3.349      | 5.891  | 4.582  | 1.565  | 4.268  | 2.499  | 2.451    | 0.865    | 1.173  |

|                      |        |        |        |        |        |        |        |        |        |        |
|----------------------|--------|--------|--------|--------|--------|--------|--------|--------|--------|--------|
| ΣLREE                | 56.212 | 56.959 | 52.068 | 59.057 | 19.432 | 53.897 | 33.804 | 16.374 | 12.463 | 15.668 |
| ΣHREE                | 14.902 | 23.756 | 16.898 | 31.152 | 8.855  | 22.268 | 17.935 | 6.233  | 4.153  | 3.943  |
| Rb/Sr                | 3.83   | 0.32   | 1.44   | 3.09   | 12.00  | 21.30  | 4.09   | 7.77   | 7.81   | 15.81  |
| Rb/Ba                | 1.17   | 0.78   | 2.81   | 0.54   | 4.48   | 10.07  | 1.30   | 7.11   | 3.34   | 4.52   |
| Nb/Ta                | 9.60   | 4.52   | 5.83   | 7.03   | 12.28  | 7.36   | 6.48   | 7.67   | 5.12   | 3.79   |
| Zr/Hf                | 25.48  | 20.97  | 18.36  | 14.46  | 17.14  | 11.74  | 21.51  | 17.62  | 20.45  | 18.88  |
| Y/Ho                 | 31.32  | 31.99  | 32.66  | 30.10  | 32.30  | 33.97  | 32.09  | 31.55  | 36.24  | 32.20  |
| 10000*Ga/Al          | 1.98   | 2.01   | 1.82   | 2.17   | 2.39   | 2.72   | 1.97   | 1.94   | 2.08   | 1.98   |
| δEu                  | 0.32   | 0.44   | 0.25   | 0.38   | 0.36   | 0.11   | 0.52   | 0.52   | 0.65   | 0.37   |
| TE <sub>1,3</sub>    | 1.08   | 1.10   | 1.10   | 1.07   | 1.12   | 1.14   | 1.06   | 1.03   | 1.10   | 1.09   |
| T <sub>Zr</sub> (°C) | 761    | 654    | 689    | 726    | 644    | 654    | 709    | 690    | 649    | 666    |

TABLE A2 (CONTINUED)

| Data Sources                       | this study         |        |        |       |        | Hu et al.(2021) |        |       |       |        |
|------------------------------------|--------------------|--------|--------|-------|--------|-----------------|--------|-------|-------|--------|
| Lithology                          | Muscovite granites |        |        |       |        | Leucogranites   |        |       |       |        |
| Sample No.                         | 18CA63             | 18CA66 | 18CA84 | AT38A | AT39A  | AT40            | AT41   | AT43  | AT44  | AT45   |
| <u>Major elements (wt.%)</u>       |                    |        |        |       |        |                 |        |       |       |        |
| SiO <sub>2</sub>                   | 74.51              | 74.65  | 76.04  | 75.50 | 73.60  | 73.60           | 74.80  | 76.30 | 71.90 | 79.10  |
| TiO <sub>2</sub>                   | 0.02               | 0.02   | 0.04   | 0.03  | 0.02   | 0.03            | 0.01   | 0.02  | 0.17  | 0.03   |
| Al <sub>2</sub> O <sub>3</sub>     | 14.29              | 14.29  | 13.62  | 13.50 | 14.80  | 15.20           | 14.40  | 13.80 | 15.00 | 13.30  |
| Fe <sub>2</sub> O <sub>3</sub> T   | 0.87               | 0.75   | 0.66   | 0.70  | 0.84   | 1.10            | 1.12   | 0.58  | 2.07  | 0.67   |
| MnO                                | 0.13               | 0.23   | 0.12   | 0.02  | 0.01   | 0.01            | 0.56   | 0.01  | 0.04  | 0.11   |
| MgO                                | 0.09               | 0.05   | 0.07   | 0.06  | 0.06   | 0.07            | 0.06   | 0.06  | 0.53  | 0.08   |
| CaO                                | 0.42               | 0.46   | 0.54   | 0.91  | 0.54   | 1.54            | 0.88   | 1.57  | 0.76  | 1.14   |
| Na <sub>2</sub> O                  | 4.46               | 4.81   | 4.38   | 3.77  | 3.99   | 5.41            | 4.36   | 6.30  | 1.98  | 3.35   |
| K <sub>2</sub> O                   | 3.97               | 3.63   | 3.77   | 4.91  | 5.89   | 2.46            | 4.48   | 0.46  | 5.56  | 1.48   |
| P <sub>2</sub> O <sub>5</sub>      | 0.13               | 0.07   | 0.03   | 0.02  | 0.02   | 0.01            | 0.03   | 0.11  | 0.32  | 0.02   |
| LOI                                | 0.37               | 0.33   | 0.00   | 0.16  | 0.32   | 0.27            | 0.18   | 0.23  | 1.04  | 0.78   |
| Total                              | 99.26              | 99.29  | 99.27  | 99.60 | 100.10 | 99.70           | 100.80 | 99.40 | 99.40 | 100.10 |
| Mg#                                | 17                 | 12     | 17     | 15    | 12     | 11              | 10     | 17    | 34    | 19     |
| ACNK                               | 1.15               | 1.13   | 1.11   | 1.03  | 1.06   | 1.06            | 1.06   | 1.01  | 1.41  | 1.45   |
| ANK                                | 1.23               | 1.21   | 1.21   | 1.17  | 1.14   | 1.31            | 1.20   | 1.27  | 1.62  | 1.87   |
| K <sub>2</sub> O/Na <sub>2</sub> O | 0.89               | 0.75   | 0.86   | 1.30  | 1.48   | 0.45            | 1.03   | 0.07  | 2.81  | 0.44   |
| <u>Trace elements (ppm)</u>        |                    |        |        |       |        |                 |        |       |       |        |
| Ga                                 | 15.88              | 19.03  | 23.15  | 14.8  | 15.7   | 16.2            | 17     | 16.3  | 20.8  | 16     |
| Rb                                 | 168.1              | 397.1  | 212.9  | 131   | 161    | 66              | 190    | 13    | 207   | 46     |
| Sr                                 | 1.669              | 1.649  | 3.736  | 34.6  | 41.2   | 56.7            | 21.4   | 29.3  | 57.6  | 93.3   |
| Y                                  | 2.671              | 56.5   | 30.69  | 82.4  | 53     | 68.5            | 44.3   | 18.4  | 25    | 33.1   |
| Zr                                 | 23.91              | 29.53  | 22.84  | 30    | 43     | 28              | 45     | 22    | 81    | 45     |
| Nb                                 | 7.149              | 37.5   | 39.77  | 6.3   | 2.5    | 3.1             | 0.8    | 3.1   | 18.5  | 10.7   |
| Cs                                 | 15.06              | 14.72  | 11.01  | 2.66  | 2.26   | 1.67            | 7.75   | 0.8   | 4.64  | 0.82   |
| Ba                                 | 3.709              | 3.251  | 5.038  | 45.3  | 81.9   | 43.3            | 18.9   | 8.4   | 203   | 102    |
| La                                 | 0.553              | 14.33  | 4.909  | 11.4  | 1.7    | 2.7             | 6.7    | 5.2   | 15.5  | 8.1    |
| Ce                                 | 1.881              | 52.59  | 11.3   | 25    | 3.6    | 3.6             | 15.6   | 10.7  | 33.5  | 17.2   |
| Pr                                 | 0.153              | 5.194  | 1.545  | 3.23  | 0.46   | 0.56            | 1.98   | 1.34  | 3.99  | 2.1    |
| Nd                                 | 0.537              | 21.27  | 5.951  | 13.9  | 2.5    | 2.8             | 8.2    | 5.6   | 16.5  | 8.7    |
| Sm                                 | 0.181              | 6.36   | 2.392  | 4.87  | 1.37   | 1.57            | 2.95   | 2.22  | 3.98  | 2.7    |
| Eu                                 | 0.008              | 0.006  | 0.085  | 0.48  | 0.33   | 0.63            | 0.24   | 0.15  | 0.52  | 0.34   |



|                      |        |        |        |       |       |       |       |       |       |       |
|----------------------|--------|--------|--------|-------|-------|-------|-------|-------|-------|-------|
| Gd                   | 0.185  | 6.129  | 2.654  | 6.79  | 3.53  | 3.78  | 2.76  | 2.87  | 3.93  | 2.68  |
| Tb                   | 0.046  | 1.3    | 0.693  | 1.49  | 0.81  | 1.04  | 0.75  | 0.48  | 0.66  | 0.6   |
| Dy                   | 0.332  | 8.352  | 4.599  | 11.7  | 7.1   | 8.4   | 6     | 3     | 4.4   | 4.7   |
| Ho                   | 0.072  | 1.73   | 0.928  | 2.65  | 1.71  | 2.18  | 1.41  | 0.51  | 0.81  | 0.99  |
| Er                   | 0.229  | 5.162  | 2.753  | 9.09  | 6.12  | 8.11  | 6.13  | 1.72  | 2.23  | 3.94  |
| Tm                   | 0.051  | 1.054  | 0.54   | 1.49  | 1.01  | 1.2   | 1.34  | 0.29  | 0.33  | 0.78  |
| Yb                   | 0.441  | 8.82   | 4.409  | 11.1  | 7.6   | 8     | 12.5  | 2.2   | 2.2   | 7.2   |
| Lu                   | 0.069  | 1.416  | 0.683  | 1.73  | 1.24  | 1.21  | 2.27  | 0.33  | 0.36  | 1.22  |
| Hf                   | 1.512  | 2.577  | 2.472  | 1.7   | 2.1   | 1.1   | 2.5   | 1.1   | 3     | 2.7   |
| Ta                   | 1.252  | 12.36  | 5.515  | 1.9   | 0.6   | 0.4   | 0.1   | 0.2   | 1.2   | 1.8   |
| Pb                   | 15.76  | 17.34  | 27.81  | 62.4  | 73.1  | 78.2  | 105.2 | 50.3  | 65.2  | 118.4 |
| Th                   | 0.659  | 7.579  | 9.289  | 18.1  | 16.3  | 24.7  | 8.6   | 5.8   | 12.1  | 7.6   |
| U                    | 1.056  | 5.201  | 2.834  | 6.01  | 4.02  | 2.77  | 3.7   | 1.87  | 3.88  | 3.33  |
| ΣLREE                | 3.313  | 99.75  | 26.182 | 58.88 | 9.96  | 11.86 | 35.67 | 25.21 | 73.99 | 39.14 |
| ΣHREE                | 1.425  | 33.963 | 17.259 | 46.04 | 29.12 | 33.92 | 33.16 | 11.4  | 14.92 | 22.11 |
| Rb/Sr                | 100.72 | 240.81 | 56.99  | 3.79  | 3.91  | 1.16  | 8.88  | 0.44  | 3.59  | 0.49  |
| Rb/Ba                | 45.32  | 122.15 | 42.26  | 2.89  | 1.97  | 1.52  | 10.05 | 1.55  | 1.02  | 0.45  |
| Nb/Ta                | 5.71   | 3.03   | 7.21   | 3.32  | 4.17  | 7.75  | 8.00  | 15.50 | 15.42 | 5.94  |
| Zr/Hf                | 15.81  | 11.46  | 9.24   | 17.65 | 20.48 | 25.45 | 18.00 | 20.00 | 27.00 | 16.67 |
| Y/Ho                 | 37.10  | 32.66  | 33.07  | 31.09 | 30.99 | 31.42 | 31.42 | 36.08 | 30.86 | 33.43 |
| 10000*Ga/Al          | 2.10   | 2.52   | 3.21   | 2.07  | 2.00  | 2.01  | 2.23  | 2.23  | 2.62  | 2.27  |
| δEu                  | 0.13   | 0.00   | 0.10   | 0.26  | 0.46  | 0.79  | 0.26  | 0.18  | 0.40  | 0.39  |
| TE <sub>1,3</sub>    | 1.27   | 1.21   | 1.16   | 1.04  | 0.96  | 0.90  | 1.11  | 1.03  | 1.03  | 1.06  |
| T <sub>Zr</sub> (°C) | 652    | 665    | 648    | 659   | 684   | 654   | 688   | 638   | 755   | 716   |

TABLE A2 (CONTINUED)

| Data Sources                       |        | Hu et al.(2021) |        |       |        |        |       |        |       |
|------------------------------------|--------|-----------------|--------|-------|--------|--------|-------|--------|-------|
| Lithology                          |        | Leucogranites   |        |       |        |        |       |        |       |
| Sample No.                         | AT48   | AT49A           | AT50   | AT51A | AT52   | AT53   | AT55  | AT56   | AT57A |
| <u>Major elements (wt.%)</u>       |        |                 |        |       |        |        |       |        |       |
| SiO <sub>2</sub>                   | 77.90  | 74.70           | 73.80  | 81.20 | 75.20  | 75.90  | 75.10 | 75.80  | 73.90 |
| TiO <sub>2</sub>                   | 0.05   | 0.06            | 0.01   | 0.02  | 0.16   | 0.07   | 0.05  | 0.02   | 0.05  |
| Al <sub>2</sub> O <sub>3</sub>     | 14.10  | 15.70           | 14.60  | 11.10 | 14.60  | 13.70  | 13.90 | 14.80  | 14.80 |
| Fe <sub>2</sub> O <sub>3</sub> T   | 1.22   | 1.10            | 1.54   | 0.59  | 1.88   | 0.90   | 0.99  | 1.68   | 1.30  |
| MnO                                | 0.30   | 0.10            | 0.66   | 0.08  | 0.04   | 0.03   | 0.05  | 0.63   | 0.18  |
| MgO                                | 0.17   | 0.25            | 0.09   | 0.06  | 0.47   | 0.20   | 0.16  | 0.10   | 0.18  |
| CaO                                | 0.46   | 0.67            | 0.39   | 0.69  | 0.80   | 0.51   | 0.50  | 0.36   | 0.39  |
| Na <sub>2</sub> O                  | 1.32   | 2.02            | 5.32   | 4.99  | 1.86   | 3.31   | 3.72  | 3.94   | 4.32  |
| K <sub>2</sub> O                   | 3.23   | 3.36            | 3.07   | 0.83  | 3.44   | 5.27   | 4.38  | 2.17   | 3.63  |
| P <sub>2</sub> O <sub>5</sub>      | 0.18   | 0.36            | 0.18   | 0.06  | 0.31   | 0.23   | 0.32  | 0.18   | 0.36  |
| LOI                                | 1.44   | 1.98            | 0.32   | 0.29  | 1.51   | 0.51   | 0.70  | 0.93   | 0.72  |
| Total                              | 100.30 | 100.30          | 100.00 | 99.90 | 100.20 | 100.50 | 99.90 | 100.60 | 99.80 |
| Mg#                                | 22     | 31              | 10     | 17    | 33     | 31     | 24    | 11     | 22    |
| ACNK                               | 2.17   | 1.92            | 1.14   | 1.07  | 1.77   | 1.13   | 1.18  | 1.56   | 1.26  |
| ANK                                | 2.49   | 2.26            | 1.21   | 1.22  | 2.15   | 1.23   | 1.28  | 1.68   | 1.34  |
| K <sub>2</sub> O/Na <sub>2</sub> O | 2.45   | 1.66            | 0.58   | 0.17  | 1.85   | 1.59   | 1.18  | 0.55   | 0.84  |
| <u>Trace elements (ppm)</u>        |        |                 |        |       |        |        |       |        |       |
| Ga                                 | 19.6   | 21.5            | 20.8   | 14.9  | 17.2   | 14.4   | 15    | 23.3   | 19.8  |

|                      |       |       |       |       |        |       |       |       |       |
|----------------------|-------|-------|-------|-------|--------|-------|-------|-------|-------|
| Rb                   | 153   | 143   | 250   | 38    | 164    | 234   | 241   | 174   | 290   |
| Sr                   | 10.9  | 27.5  | 10.2  | 15.4  | 77.2   | 65.3  | 39    | 9     | 8.1   |
| Y                    | 15.6  | 12.4  | 23.5  | 25.9  | 29.4   | 11.2  | 9.9   | 40.5  | 9.3   |
| Zr                   | 16    | 31    | 33    | 13    | 94     | 44    | 37    | 24    | 33    |
| Nb                   | 39.7  | 24.3  | 16.4  | 8     | 12.6   | 8.6   | 12.9  | 40.6  | 22    |
| Cs                   | 2.28  | 1.9   | 5.81  | 2.96  | 6.59   | 16.6  | 7.09  | 3.38  | 14.55 |
| Ba                   | 14.9  | 29.4  | 15.6  | 14.1  | 283    | 221   | 146   | 26.7  | 24.8  |
| La                   | 2.2   | 3.9   | 4.1   | 6.4   | 21.5   | 8.6   | 6     | 2.6   | 3.3   |
| Ce                   | 5.3   | 9.2   | 10    | 14.6  | 48.5   | 19.5  | 13    | 7     | 7.7   |
| Pr                   | 0.64  | 1.05  | 1.28  | 1.83  | 5.59   | 2.26  | 1.4   | 0.98  | 0.92  |
| Nd                   | 2.8   | 4     | 5     | 8.2   | 22.6   | 8.7   | 5.5   | 4.3   | 3.2   |
| Sm                   | 1.22  | 1.45  | 2.04  | 2.89  | 5.22   | 2.08  | 1.71  | 1.82  | 1     |
| Eu                   | 0.1   | 0.12  | 0.05  | 0.09  | 0.62   | 0.25  | 0.25  | 0.04  | 0.09  |
| Gd                   | 1.67  | 1.51  | 2.28  | 2.7   | 4.78   | 1.88  | 1.45  | 2.3   | 1.07  |
| Tb                   | 0.38  | 0.29  | 0.49  | 0.59  | 0.81   | 0.34  | 0.23  | 0.75  | 0.19  |
| Dy                   | 2.3   | 2.1   | 3.7   | 3.8   | 5.7    | 2     | 1.6   | 6     | 1.5   |
| Ho                   | 0.49  | 0.38  | 0.69  | 0.77  | 1.05   | 0.41  | 0.33  | 1.13  | 0.3   |
| Er                   | 1.77  | 1.11  | 1.92  | 2.34  | 2.97   | 1.15  | 1.05  | 3.94  | 1.08  |
| Tm                   | 0.31  | 0.21  | 0.39  | 0.46  | 0.41   | 0.16  | 0.15  | 0.76  | 0.17  |
| Yb                   | 3     | 1.4   | 3.5   | 3.5   | 3      | 1.1   | 1.1   | 6.4   | 1.3   |
| Lu                   | 0.54  | 0.21  | 0.51  | 0.55  | 0.46   | 0.19  | 0.2   | 0.93  | 0.2   |
| Hf                   | 1     | 2     | 2.3   | 1     | 3.1    | 1.6   | 1.5   | 2     | 2     |
| Ta                   | 9.6   | 4.2   | 2.5   | 0.9   | 1.7    | 1.3   | 3     | 19.3  | 6.8   |
| Pb                   | 18    | 18.3  | 16.8  | 51    | 75.1   | 35    | 29.4  | 19.3  | 21.4  |
| Th                   | 4.2   | 4.2   | 4.5   | 5.7   | 16.3   | 7.3   | 5.3   | 4.2   | 3.6   |
| U                    | 2.44  | 3.54  | 2.25  | 1.77  | 3.93   | 1.12  | 3.58  | 2.23  | 2.86  |
| ΣLREE                | 12.26 | 19.72 | 22.47 | 34.01 | 104.03 | 41.39 | 27.86 | 16.74 | 16.21 |
| ΣHREE                | 10.46 | 7.21  | 13.48 | 14.71 | 19.18  | 7.23  | 6.11  | 22.21 | 5.81  |
| Rb/Sr                | 14.04 | 5.20  | 24.51 | 2.47  | 2.12   | 3.58  | 6.18  | 19.33 | 35.80 |
| Rb/Ba                | 10.27 | 4.86  | 16.03 | 2.70  | 0.58   | 1.06  | 1.65  | 6.52  | 11.69 |
| Nb/Ta                | 4.14  | 5.79  | 6.56  | 8.89  | 7.41   | 6.62  | 4.30  | 2.10  | 3.24  |
| Zr/Hf                | 16.00 | 15.50 | 14.35 | 13.00 | 30.32  | 27.50 | 24.67 | 12.00 | 16.50 |
| Y/Ho                 | 31.84 | 32.63 | 34.06 | 33.64 | 28.00  | 27.32 | 30.00 | 35.84 | 31.00 |
| 10000*Ga/Al          | 2.63  | 2.59  | 2.69  | 2.54  | 2.23   | 1.99  | 2.04  | 2.97  | 2.53  |
| δEu                  | 0.21  | 0.25  | 0.07  | 0.10  | 0.38   | 0.39  | 0.49  | 0.06  | 0.27  |
| TE <sub>1,3</sub>    | 1.08  | 1.11  | 1.14  | 1.06  | 1.05   | 1.05  | 1.00  | 1.25  | 1.09  |
| T <sub>Zr</sub> (°C) | 661   | 701   | 672   | 614   | 786    | 694   | 685   | 672   | 680   |

Note:  $Mg\# = (100 \times MgO / 40.31) / (MgO / 40.31 + 0.8998 \times Fe_2O_3T / 71.85)$ ;

$\delta Eu = Eu_N / (Sm_N \times Gd_N)^{1/2}$ , where subscript N denotes chondrite normalization;

TE<sub>1,3</sub> was from Irber, 1999;

T<sub>Zr</sub>(°C) was from Watson and Harrison, 1983.

TABLE S7. WHOLE-ROCK SR AND ND ISOTOPE DATA FOR GRANITE DYKES FROM THE SOUTHERN CHINESE ALTAI

| Sample                      | Rb    | Sr    | Sm    | Nd    | <sup>87</sup> Rb/ <sup>86</sup> Sr | <sup>87</sup> Sr/ <sup>86</sup> Sr | ( <sup>87</sup> Sr/ <sup>86</sup> Sr) <sub>i</sub> | <sup>147</sup> Sm/ <sup>144</sup> Nd | <sup>143</sup> Nd/ <sup>144</sup> Nd | ( <sup>143</sup> Nd/ <sup>144</sup> Nd) <sub>i</sub> | f <sub>Sm/Nd</sub> | ε <sub>Nd</sub> (t) | T <sub>DM-1</sub> | T <sub>DM-2</sub> |
|-----------------------------|-------|-------|-------|-------|------------------------------------|------------------------------------|----------------------------------------------------|--------------------------------------|--------------------------------------|------------------------------------------------------|--------------------|---------------------|-------------------|-------------------|
| Fuyun granite dykes         |       |       |       |       |                                    |                                    |                                                    |                                      |                                      |                                                      |                    |                     |                   |                   |
| 18CA11                      | 96.3  | 255.4 | 2.57  | 14.77 | 1.053                              | 0.7087                             | 0.7048                                             | 0.105                                | 0.5128                               | 0.5126                                               | -0.47              | 5.8                 | 525               | 560               |
| 18CA89                      | 74.11 | 244.1 | 3.178 | 18.03 | 0.848                              | 0.7071                             | 0.7039                                             | 0.106                                | 0.5128                               | 0.5126                                               | -0.46              | 6.1                 | 506               | 535               |
| 18CA90                      | 117.4 | 290.3 | 2.632 | 15.68 | 1.129                              | 0.7083                             | 0.7040                                             | 0.101                                | 0.5128                               | 0.5126                                               | -0.48              | 5.7                 | 527               | 573               |
| Kalasu-Aletai granite dykes |       |       |       |       |                                    |                                    |                                                    |                                      |                                      |                                                      |                    |                     |                   |                   |
| 18CA59                      | 25.07 | 77.32 | 4.013 | 12.94 | 0.905                              | 0.7135                             | 0.7101                                             | 0.187                                | 0.5125                               | 0.5122                                               | -0.05              | -1.4                | 3468              | 1144              |
| 18CA67                      | 40.34 | 28.08 | 3.266 | 10.78 | 4.011                              | 0.7259                             | 0.7108                                             | 0.183                                | 0.5124                               | 0.5121                                               | -0.07              | -4.0                | 3672              | 1354              |
| 18CA73                      | 170.5 | 55.26 | 4.807 | 15.33 | 8.615                              | 0.7508                             | 0.7183                                             | 0.189                                | 0.5126                               | 0.5123                                               | -0.04              | -0.2                | 3347              | 1044              |
| 18CA76                      | 250.9 | 20.9  | 1.351 | 4.218 | 33.518                             | 0.8241                             | 0.6978                                             | 0.194                                | 0.5126                               | 0.5122                                               | -0.02              | -1.0                | 4275              | 1107              |
| 18CA79                      | 214   | 82.97 | 4.101 | 20.81 | 7.201                              | 0.7325                             | 0.7053                                             | 0.119                                | 0.5121                               | 0.5119                                               | -0.39              | -7.6                | 1666              | 1650              |
| 18CA83                      | 212.9 | 27.25 | 0.707 | 2.518 | 21.814                             | 0.7891                             | 0.7069                                             | 0.170                                | 0.5125                               | 0.5122                                               | -0.14              | -2.4                | 2348              | 1223              |
| 18CA66                      | 397.1 | 1.649 | 6.36  | 21.27 | 672.368                            |                                    |                                                    | 0.181                                | 0.5126                               | 0.5123                                               | -0.08              | -0.8                | 2672              | 1094              |
| 18CA84                      | 212.9 | 3.736 | 2.392 | 5.951 | 159.110                            |                                    |                                                    | 0.243                                | 0.5129                               | 0.5125                                               | 0.23               | 3.0                 | -1446             | 789               |

Note: Ages are in Ma and elements in ppm.

$$(^{87}\text{Sr}/^{86}\text{Sr})_i = (^{87}\text{Sr}/^{86}\text{Sr})_s - (^{87}\text{Rb}/^{86}\text{Sr})_s \times (e^{\lambda t} - 1);$$

$$(^{143}\text{Nd}/^{144}\text{Nd})_i = (^{143}\text{Nd}/^{144}\text{Nd})_s - (^{147}\text{Sm}/^{144}\text{Nd})_s \times (e^{\lambda t} - 1);$$

$$\epsilon_{\text{Nd}}(t) = ((^{143}\text{Nd}/^{144}\text{Nd})_s / (^{143}\text{Nd}/^{144}\text{Nd})_{\text{CHUR}} - 1) \times 10,000;$$

$$f_{\text{Sm/Nd}} = (^{147}\text{Sm}/^{144}\text{Nd})_s / (^{147}\text{Sm}/^{144}\text{Nd})_{\text{CHUR}} - 1;$$

$$T_{\text{DM-1}} = 1/\lambda_{\text{Sm}} \times \ln(1 + ((^{143}\text{Nd}/^{144}\text{Nd})_s - 0.51315) / ((^{147}\text{Sm}/^{144}\text{Nd})_s - 0.2137));$$

$$T_{\text{DM-2}} = T_{\text{DM-1}} - (T_{\text{DM-1}} - t) \times (-0.4 - f_{\text{Sm/Nd}}) / (-0.4 - 0.08592);$$

Where S= sample, t = age, (<sup>143</sup>Nd/<sup>144</sup>Nd)<sub>CHUR</sub> = 0.512638, (<sup>147</sup>Sm/<sup>144</sup>Nd)<sub>CHUR</sub> = 0.1967.
